# Supplementary material for: Long-wavelength NIR luminescence of 2,2′-bipyridyl-Pt(ii) dimers achieved by enhanced Pt–Pt interaction
Source: Royal Society of Chemistry journal article supplement (doi:10.1039/d1qi00546d), 2021-01-01
Supplement: d1qi00546d1.pdf [file d1qi00546d1.pdf]

## **Electronic Supplementary Information (ESI)**

### **Long wavelength NIR luminescence of 2,2'-bipyridyl-Pt(II) dimers achieved by enhanced Pt-Pt interaction**

Meng-Meng Su, Jun Ni,<sup>\*</sup> Zhong-Cui Guo, Shu-Qin Liu, Jian-Jun Zhang and Chang-Gong Meng

School of Chemical Engineering, Dalian University of Technology, Linggong Road No. 2, Dalian  
116024, P. R. China

<sup>\*</sup> Corresponding author.

E-mail: nijun@dlut.edu.cn

## Contents

|                                                                                                                                                                                                                                                                                                                                                                                                                                                                                        |      |
|----------------------------------------------------------------------------------------------------------------------------------------------------------------------------------------------------------------------------------------------------------------------------------------------------------------------------------------------------------------------------------------------------------------------------------------------------------------------------------------|------|
| <b>Table S1.</b> Crystal data and structure refinement for complexes <b>1</b> , <b>2</b> , <b>5</b> and <b>6</b> .....                                                                                                                                                                                                                                                                                                                                                                 | S-5  |
| <b>Table S2.</b> Selected bond lengths (Å) and angles (°) for complexes <b>1</b> , <b>2</b> , <b>5</b> and <b>6</b> .....                                                                                                                                                                                                                                                                                                                                                              | S-6  |
| <b>Table S3.</b> Important hydrogen-bonding geometry (Å,°) and short interactions in <b>1</b> , <b>2</b> , <b>5</b> , and <b>6</b> .....                                                                                                                                                                                                                                                                                                                                               | S-7  |
| <b>Figure S1.</b> Thermogravimetric analysis curves of complexes <b>1</b> , <b>2</b> , <b>4</b> , <b>5</b> and <b>6</b> after recrystallized from CH <sub>2</sub> Cl <sub>2</sub> .....                                                                                                                                                                                                                                                                                                | S-8  |
| <b>Figure S2.</b> Thermogravimetric analysis curves of complex <b>3</b> after recrystallized from CH <sub>2</sub> Cl <sub>2</sub> , ClCH <sub>2</sub> CH <sub>2</sub> Cl and CH <sub>3</sub> CN.....                                                                                                                                                                                                                                                                                   | S-9  |
| <b>Figure S3.</b> The PXRD patterns of <b>3</b> after recrystallized from CH <sub>2</sub> Cl <sub>2</sub> (black line), ClCH <sub>2</sub> CH <sub>2</sub> Cl (red line) and CH <sub>3</sub> CN (blue line).....                                                                                                                                                                                                                                                                        | S-10 |
| <b>Figure S4.</b> (a) Photographic images under ambient light and UV light irradiation ( $\lambda_{\text{ex}} = 365$ nm) of <b>3</b> ½(CH <sub>2</sub> Cl <sub>2</sub> ) before and after heating at 150 °C. (b) Thermogravimetric analysis curves of <b>3</b> ½(CH <sub>2</sub> Cl <sub>2</sub> ) after heating at 150 °C. (c) PXRD patterns and (d) emission spectra of <b>3</b> ½(CH <sub>2</sub> Cl <sub>2</sub> ) before (black line) and after (red line) heating at 150 °C..... | S-11 |
| <b>Figure S5.</b> The dimer structure of complexes <b>5</b> and <b>6</b> . The disordered atoms and H atoms are deleted for clarity.....                                                                                                                                                                                                                                                                                                                                               | S-12 |
| <b>Figure S6.</b> The hydrogen bonding and $\pi$ - $\pi$ stacking interactions between adjacent dimers (along <i>c</i> axis) of complex <b>1</b> .....                                                                                                                                                                                                                                                                                                                                 | S-13 |
| <b>Figure S7.</b> The hydrogen bonding and $\pi$ - $\pi$ stacking interactions between adjacent dimers (along <i>c</i> axis) of complex <b>2</b> .....                                                                                                                                                                                                                                                                                                                                 | S-14 |
| <b>Figure S8.</b> The $\pi$ - $\pi$ stacking interactions between adjacent dimers (along <i>c</i> axis) of complex <b>5</b> .....                                                                                                                                                                                                                                                                                                                                                      | S-15 |
| <b>Figure S9.</b> The hydrogen bonding and $\pi$ - $\pi$ stacking interactions between adjacent dimers (along <i>c</i> axis) of complex <b>6</b> .....                                                                                                                                                                                                                                                                                                                                 | S-16 |
| <b>Figure S10.</b> The layer stacking structure of complex <b>1</b> .....                                                                                                                                                                                                                                                                                                                                                                                                              | S-17 |
| <b>Figure S11.</b> The layer stacking structure of complex <b>2</b> .....                                                                                                                                                                                                                                                                                                                                                                                                              | S-18 |
| <b>Figure S12.</b> The layer stacking structure of complex <b>5</b> .....                                                                                                                                                                                                                                                                                                                                                                                                              | S-19 |

**Figure S13.** The layer stacking structure of complex **6**.....S-20

**Figure S14.** The reversible mechanoluminescence of complex **2**. (a) Photographic images of samples [(i) unground sample, (ii) ground sample, (iii) ground sample with a drop of CH<sub>2</sub>Cl<sub>2</sub> added] under ambient light irradiation during the reversible process. (b) Absorption spectra, (c) emission spectra and (d) PXRD patterns of unground sample (black line), ground sample (red line), and ground sample with a drop of CH<sub>2</sub>Cl<sub>2</sub> added (blue line).....S-21

**Figure S15.** The reversible mechanoluminescence of complex **3**. (a) Photographic images of samples [(i) unground sample, (ii) ground sample, (iii) ground sample with a drop of CH<sub>2</sub>Cl<sub>2</sub> added] under ambient light irradiation during the reversible process. (b) Absorption spectra, (c) emission spectra and (d) PXRD patterns of unground sample (black line), ground sample (red line), and ground sample with a drop of CH<sub>2</sub>Cl<sub>2</sub> added (blue line).....S-22

**Figure S16.** The reversible mechanoluminescence of complex **4**. (a) Photographic images of samples [(i) unground sample, (ii) ground sample, (iii) ground sample with a drop of CH<sub>2</sub>Cl<sub>2</sub> added] under ambient light irradiation during the reversible process. (b) Absorption spectra, (c) emission spectra and (d) PXRD patterns of unground sample (black line), ground sample (red line), and ground sample with a drop of CH<sub>2</sub>Cl<sub>2</sub> added (blue line).....S-23

**Figure S17.** The reversible mechanoluminescence of complex **5**. (a) Photographic images of samples [(i) unground sample, (ii) ground sample, (iii) ground sample with a drop of CH<sub>2</sub>Cl<sub>2</sub> added] under ambient light irradiation during the reversible process. (b) Absorption spectra, (c) emission spectra and (d) PXRD patterns of unground sample (black line), ground sample (red line), and ground sample with a drop of CH<sub>2</sub>Cl<sub>2</sub> added (blue line).....S-24

**Figure S18.** The reversible mechanoluminescence of complex **6**. (a) Photographic images of samples [(i) unground sample, (ii) ground sample, (iii) ground sample with a drop of CH<sub>2</sub>Cl<sub>2</sub> added] under ambient light irradiation during the reversible process. (b) Absorption spectra, (c) emission spectra and (d) PXRD patterns of unground sample (black line), ground sample (red line), and ground sample with a drop of CH<sub>2</sub>Cl<sub>2</sub> added (blue line).....S-25

**Figure S19.** (a) Plot of emission wavelength changes during 10-cycles of grinding/vapor absorbing process of **1**. (b) Luminescence spectra and (c) PXRD pattern of **1** before and after 10-cycles of grinding/vapor absorbing process.....S-26

**Figure S20.** (a) Plot of emission wavelength changes during 10-cycles of grinding/vapor absorbing process of **2**. (b) Luminescence spectra and (c) PXRD pattern of **2** before and after 10-cycles of grinding/vapor absorbing process.....S-27

**Figure S21.** (a) Plot of emission wavelength changes during 10-cycles of grinding/vapor absorbing process of **3**. (b) Luminescence spectra and (c) PXRD pattern of **3** before and after 10-cycles of grinding/vapor absorbing process.....S-28

**Figure S22.** (a) Plot of emission wavelength changes during 10-cycles of grinding/vapor absorbing process of **4**. (b) Luminescence spectra and (c) PXRD pattern of **4** before and after 10-cycles of grinding/vapor absorbing process.....S-29

**Figure S23.** (a) Plot of emission wavelength changes during 10-cycles of grinding/vapor absorbing process of **5**. (b) Luminescence spectra and (c) PXRD pattern of **5** before and after 10-cycles of grinding/vapor absorbing process.....S-30

**Figure S24.** (a) Plot of emission wavelength changes during 10-cycles of grinding/vapor absorbing process of **6**. (b) Luminescence spectra and (c) PXRD pattern of **6** before and after 10-cycles of grinding/vapor absorbing process.....S-31

**Table S1.** Crystal data and structure refinement for complexes **1**, **2**, **5** and **6**.

|                                                             | <b>1</b>                                                         | <b>2</b>                                                         | <b>5</b>                                                                         | <b>6</b>                                                                         |
|-------------------------------------------------------------|------------------------------------------------------------------|------------------------------------------------------------------|----------------------------------------------------------------------------------|----------------------------------------------------------------------------------|
| Empirical formula                                           | C <sub>44</sub> H <sub>50</sub> N <sub>2</sub> PtSi <sub>2</sub> | C <sub>46</sub> H <sub>54</sub> N <sub>2</sub> PtSi <sub>2</sub> | C <sub>42</sub> H <sub>44</sub> Cl <sub>2</sub> N <sub>2</sub> PtSi <sub>2</sub> | C <sub>42</sub> H <sub>44</sub> Br <sub>2</sub> N <sub>2</sub> PtSi <sub>2</sub> |
| <i>M</i>                                                    | 858.13                                                           | 886.18                                                           | 898.96                                                                           | 987.88                                                                           |
| Crystal system                                              | monoclinic                                                       | monoclinic                                                       | monoclinic                                                                       | monoclinic                                                                       |
| Space group                                                 | <i>C2/c</i>                                                      | <i>P2/c</i>                                                      | <i>C2/c</i>                                                                      | <i>C2/c</i>                                                                      |
| <i>a</i> / Å                                                | 41.9131(12)                                                      | 21.9102(16)                                                      | 42.451(4)                                                                        | 42.721(4)                                                                        |
| <i>b</i> / Å                                                | 14.9174(4)                                                       | 15.4983(13)                                                      | 14.8742(14)                                                                      | 15.0203(16)                                                                      |
| <i>c</i> / Å                                                | 13.0806(4)                                                       | 13.0730(9)                                                       | 13.1745(12)                                                                      | 13.1674(14)                                                                      |
| $\beta$ / °                                                 | 93.1230(10)                                                      | 103.155(4)                                                       | 95.890(3)                                                                        | 95.929(5)                                                                        |
| <i>V</i> / Å <sup>3</sup>                                   | 8166.3(4)                                                        | 4322.7(6)                                                        | 8274.8(13)                                                                       | 8404.1(15)                                                                       |
| <i>Z</i>                                                    | 8                                                                | 4                                                                | 8                                                                                | 8                                                                                |
| <i>D<sub>c</sub></i> / g cm <sup>-3</sup>                   | 1.396                                                            | 1.362                                                            | 1.443                                                                            | 1.562                                                                            |
| $\mu$ (mm <sup>-1</sup> )                                   | 3.526                                                            | 3.333                                                            | 3.609                                                                            | 5.328                                                                            |
| Radiation ( $\lambda$ , Å)                                  | 0.71073                                                          | 0.71073                                                          | 0.71073                                                                          | 0.71073                                                                          |
| <i>T</i> / K                                                | 210(2)                                                           | 210(2)                                                           | 200(2)                                                                           | 210(2)                                                                           |
| <i>F</i> (000)                                              | 2712                                                             | 1800                                                             | 3600                                                                             | 3888                                                                             |
| <i>R</i> <sub>int</sub>                                     | 0.035                                                            | 0.039                                                            | 0.161                                                                            | 0.027                                                                            |
| Reflections collected / uniques                             | 16356/7089                                                       | 14648/7557                                                       | 71115/7279                                                                       | 18689/7293                                                                       |
| Observed reflections ( <i>I</i> > 2σ( <i>I</i> ))           | 5688                                                             | 5425                                                             | 4854                                                                             | 5758                                                                             |
| <i>R</i> 1 <sup><i>a</i></sup> ( <i>I</i> > 2σ( <i>I</i> )) | 0.0405                                                           | 0.0451                                                           | 0.0549                                                                           | 0.1162                                                                           |
| <i>wR</i> 2 <sup><i>b</i></sup> (all data)                  | 0.1157                                                           | 0.01175                                                          | 0.1453                                                                           | 0.2729                                                                           |
| GOF                                                         | 1.002                                                            | 1.018                                                            | 1.072                                                                            | 1.108                                                                            |

$$^a R1 = \Sigma |F_o - F_c| / \Sigma F_o, \quad ^b wR2 = \Sigma [w(F_o^2 - F_c^2)^2] / \Sigma [w(F_o^2)]^{1/2}.$$

**Table S2.** Selected bond lengths (Å) and angles (°) for complexes **1**, **2**, **5** and **6**.

|                        | <b>1</b>  | <b>2</b>  | <b>5</b>  | <b>6</b>  |
|------------------------|-----------|-----------|-----------|-----------|
| Pt–Pt (within dimer)   | 3.1737(4) | 3.1674(4) | 3.1973(7) | 3.1925(8) |
| Pt–Pt (between dimers) | 4.9276(3) | 4.9813(4) | 4.9139(5) | 4.8767(7) |
| Pt–N                   | 2.060(5)  | 2.052(6)  | 2.066(7)  | 2.130(10) |
|                        | 2.062(6)  | 2.059(5)  | 2.067(8)  | 2.067(10) |
| Pt–C                   | 1.932(7)  | 1.955(8)  | 1.923(10) | 1.964(6)  |
|                        | 1.961(7)  | 1.972(10) | 1.933(10) | 1.954(4)  |
| N1–Pt–N2               | 79.3(2)   | 78.8(2)   | 78.9(3)   | 78.5(4)   |
| C–Pt–C                 | 88.9(3)   | 88.9(3)   | 88.3(4)   | 89.4(4)   |
| N1–Pt–C                | 96.5(2)   | 96.6(3)   | 97.4(3)   | 94.8(4)   |
|                        | 174.0(2)  | 173.9(2)  | 173.9(3)  | 175.7(4)  |
| N2–Pt–C                | 95.4(3)   | 95.8(3)   | 95.4(3)   | 97.2(3)   |
|                        | 175.7(2)  | 175.3(3)  | 176.3(3)  | 172.9(4)  |

**Table S3** Important hydrogen-bonding geometry (Å, °) and short interactions in **1**, **2**, **5**, and **6**.

| 1                                       |             |                 |                     |                        |                |
|-----------------------------------------|-------------|-----------------|---------------------|------------------------|----------------|
| <i>D</i> -H $\cdots A$                  | <i>D</i> -H | H $\cdots A$    | <i>D</i> $\cdots A$ | <i>D</i> -H $\cdots A$ | Symmetry code  |
| C5-H5A $\cdots \pi$ (C19 $\equiv$ C20)  | 0.96        | 2.71            | 3.365(9)            | 152(2)                 | x, 1-y, -1/2+z |
|                                         |             | center...center |                     | Symmetry code          |                |
| $\pi$ (Cg1)... $\pi$ (C27 $\equiv$ C28) |             | 3.233(1)        |                     | -x, 1-y, 1-z           |                |
| 2                                       |             |                 |                     |                        |                |
| <i>D</i> -H $\cdots A$                  | <i>D</i> -H | H $\cdots A$    | <i>D</i> $\cdots A$ | <i>D</i> -H $\cdots A$ | Symmetry code  |
| C1-H1A $\cdots \pi$ (C19 $\equiv$ C20)  | 0.96        | 2.48            | 3.366(9)            | 149(2)                 | -x, 1-y, 1+z   |
|                                         |             | center...center |                     | Symmetry code          |                |
| $\pi$ (Cg1)... $\pi$ (C27 $\equiv$ C28) |             | 3.256(1)        |                     | 2-x, 1-y, 1-z          |                |
| 5                                       |             |                 |                     |                        |                |
| <i>D</i> -H $\cdots A$                  | <i>D</i> -H | H $\cdots A$    | <i>D</i> $\cdots A$ | <i>D</i> -H $\cdots A$ | Symmetry code  |
| C42-H42 $\cdots$ C11'                   | 0.95        | 2.89            | 3.820(3)            | 166(1)                 | -x, 1+y, 1/2-z |
|                                         |             | center...center |                     | Symmetry code          |                |
| $\pi$ (Cg1)... $\pi$ (C35 $\equiv$ C36) |             | 3.304(1)        |                     | -x, 2-y, -z            |                |
| 6                                       |             |                 |                     |                        |                |
| <i>D</i> -H $\cdots A$                  | <i>D</i> -H | H $\cdots A$    | <i>D</i> $\cdots A$ | <i>D</i> -H $\cdots A$ | Symmetry code  |
| C21-H21A $\cdots \pi$ (C8 $\equiv$ C9)  | 0.96        | 2.78            | 3.731(3)            | 171(2)                 | x, 1-y, -1/2+z |
|                                         |             | center...center |                     | Symmetry code          |                |
| $\pi$ (Cg2)... $\pi$ (C35 $\equiv$ C36) |             | 3.303(1)        |                     | 1-x, 1-y, 1-z          |                |

Cg1 is the pyridine ring containing N1 atom, Cg2 is the pyridine ring containing N2 atom.

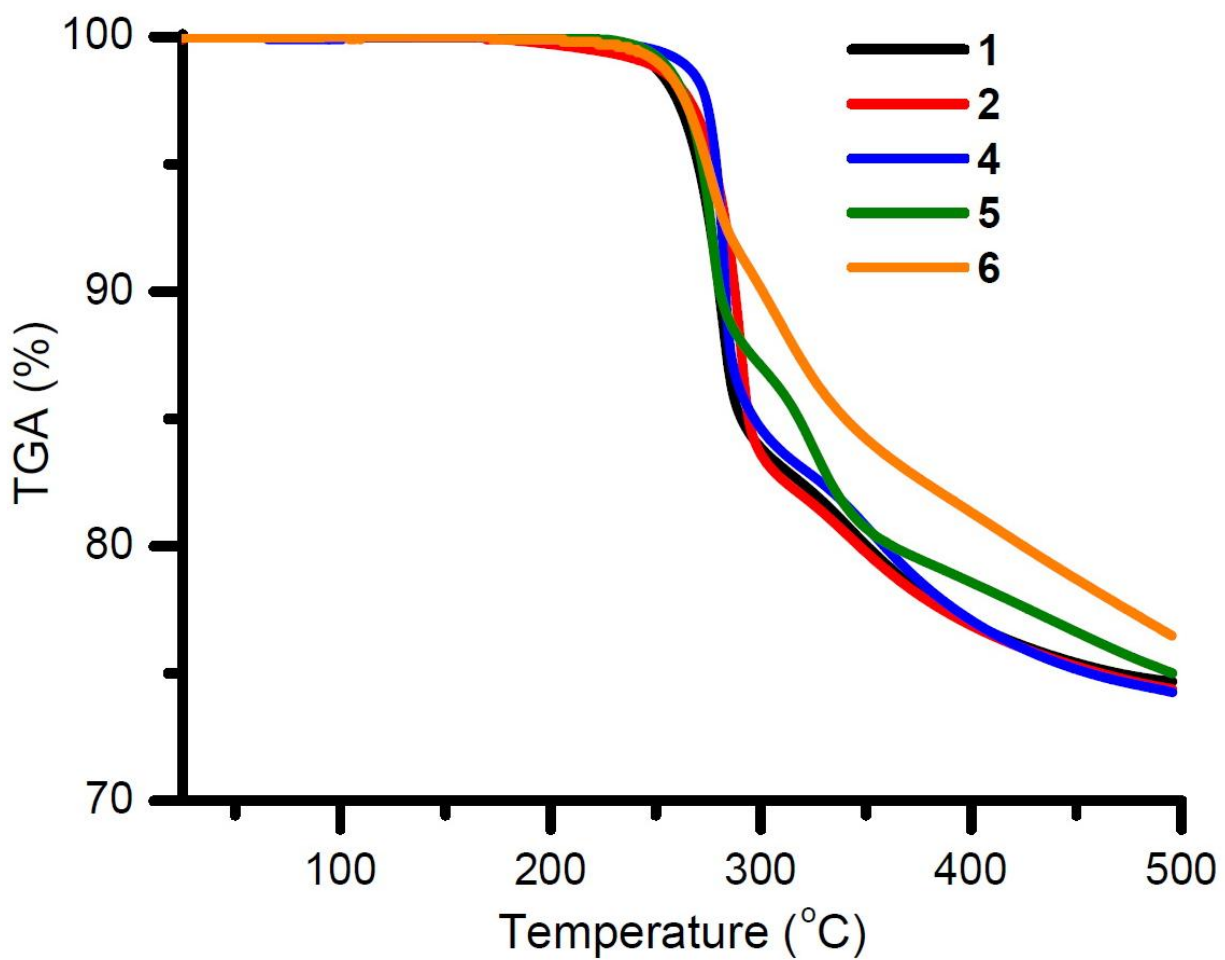

**Figure S1.** Thermogravimetric analysis curves of complexes **1**, **2**, **4**, **5** and **6** after recrystallized from  $\text{CH}_2\text{Cl}_2$ .



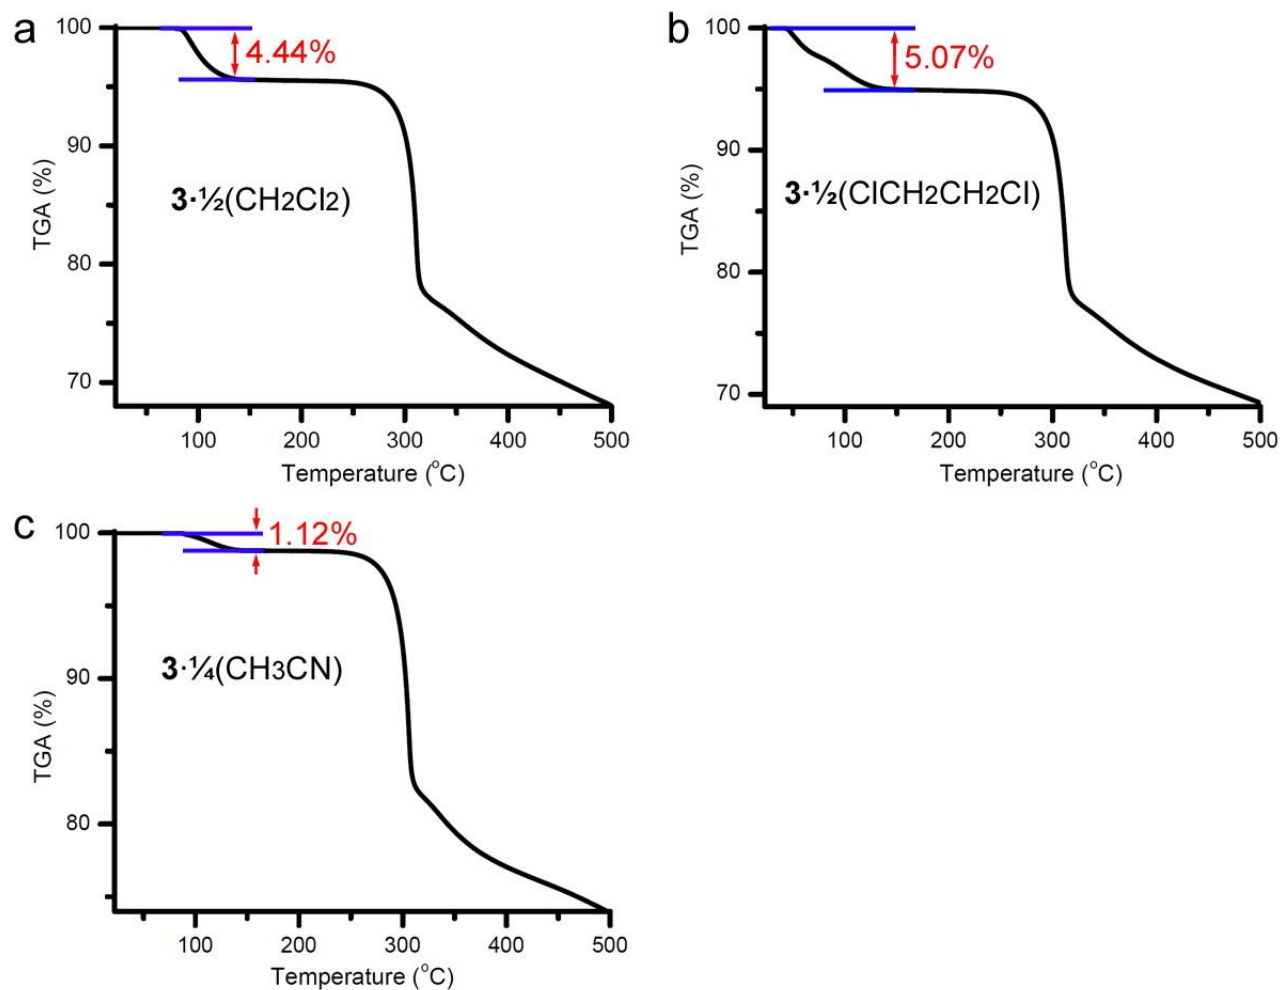

**Figure S2.** Thermogravimetric analysis curves of complex **3** after recrystallized from  $\text{CH}_2\text{Cl}_2$ ,  $\text{ClCH}_2\text{CH}_2\text{Cl}$  and  $\text{CH}_3\text{CN}$ .

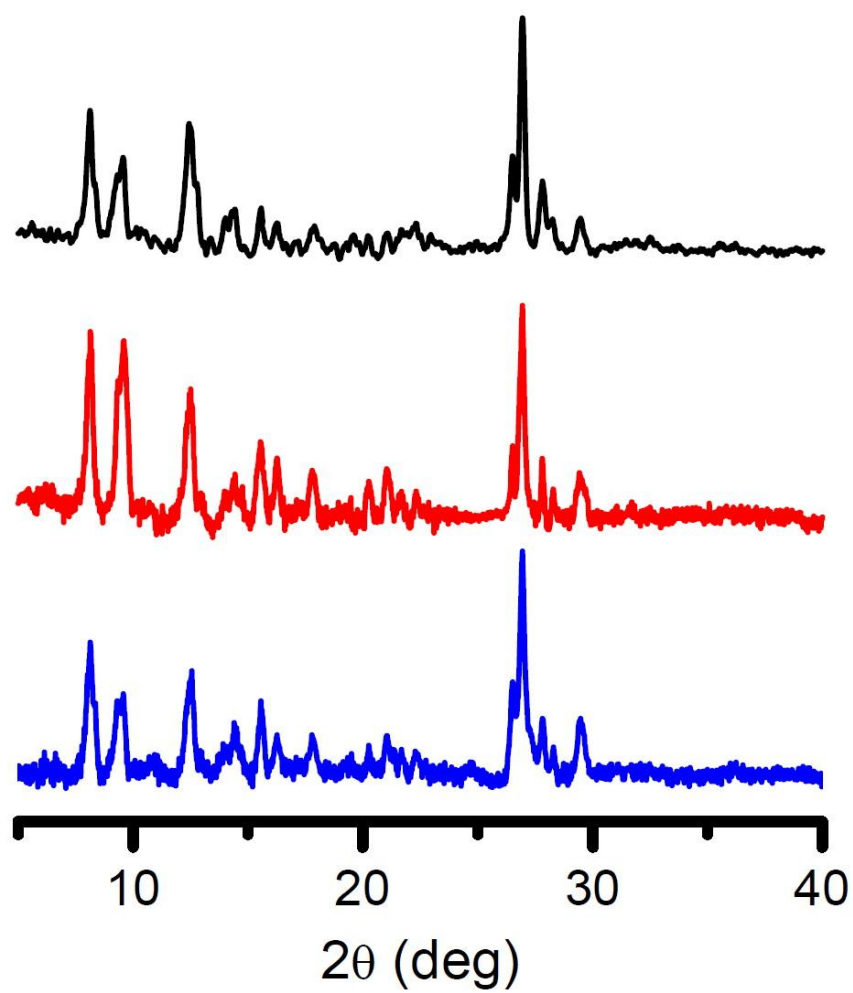

**Figure S3.** The PXRD patterns of **3** after recrystallized from  $\text{CH}_2\text{Cl}_2$  (black line),  $\text{ClCH}_2\text{CH}_2\text{Cl}$  (red line) and  $\text{CH}_3\text{CN}$  (blue line).

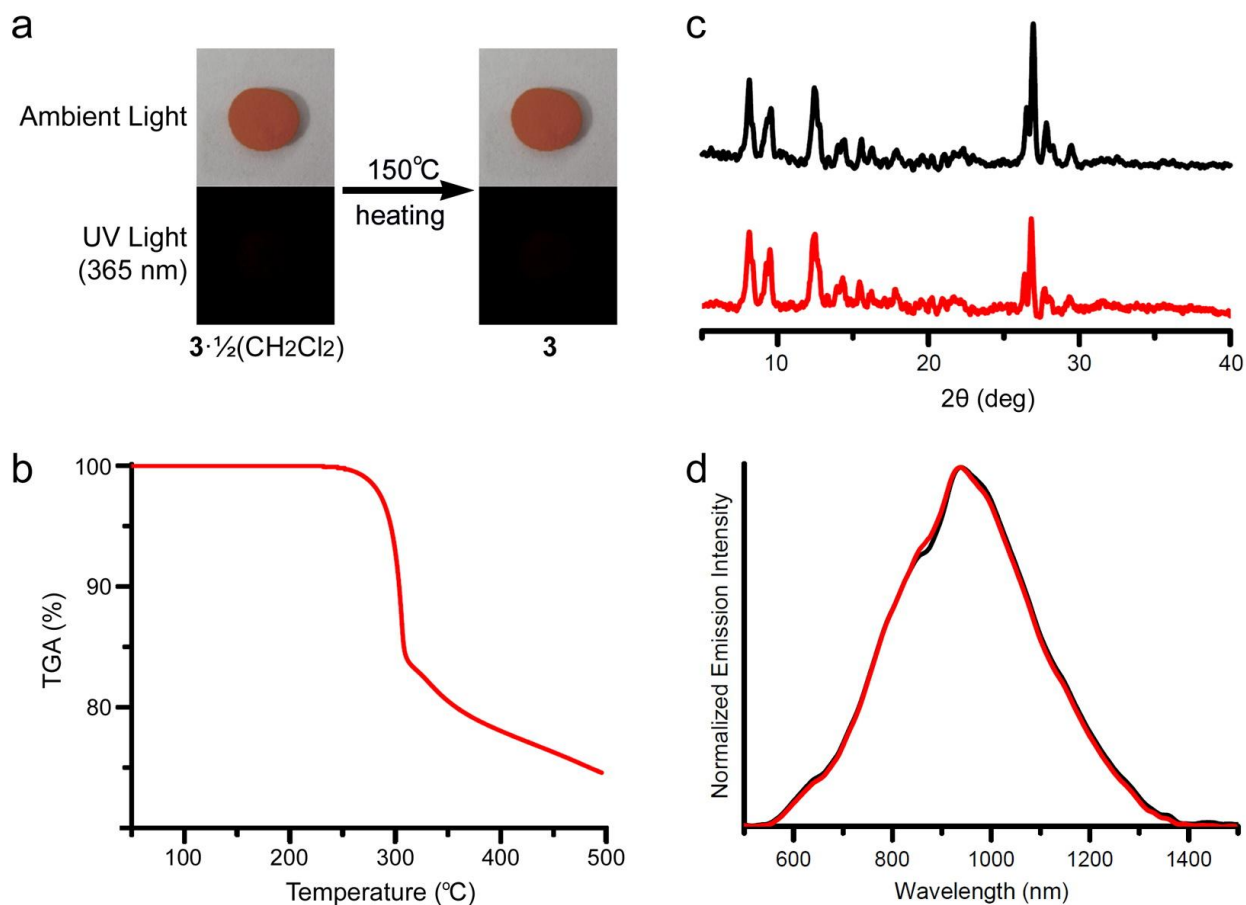

**Figure S4.** (a) Photographic images under ambient light and UV light irradiation ( $\lambda_{\text{ex}} = 365$  nm) of **3**  $\cdot$   $\frac{1}{2}(\text{CH}_2\text{Cl}_2)$  before and after heating at 150 °C. (b) Thermogravimetric analysis curves of **3**  $\cdot$   $\frac{1}{2}(\text{CH}_2\text{Cl}_2)$  after heating at 150 °C. (c) PXRD patterns and (d) emission spectra of **3**  $\cdot$   $\frac{1}{2}(\text{CH}_2\text{Cl}_2)$  before (black line) and after (red line) heating at 150 °C.

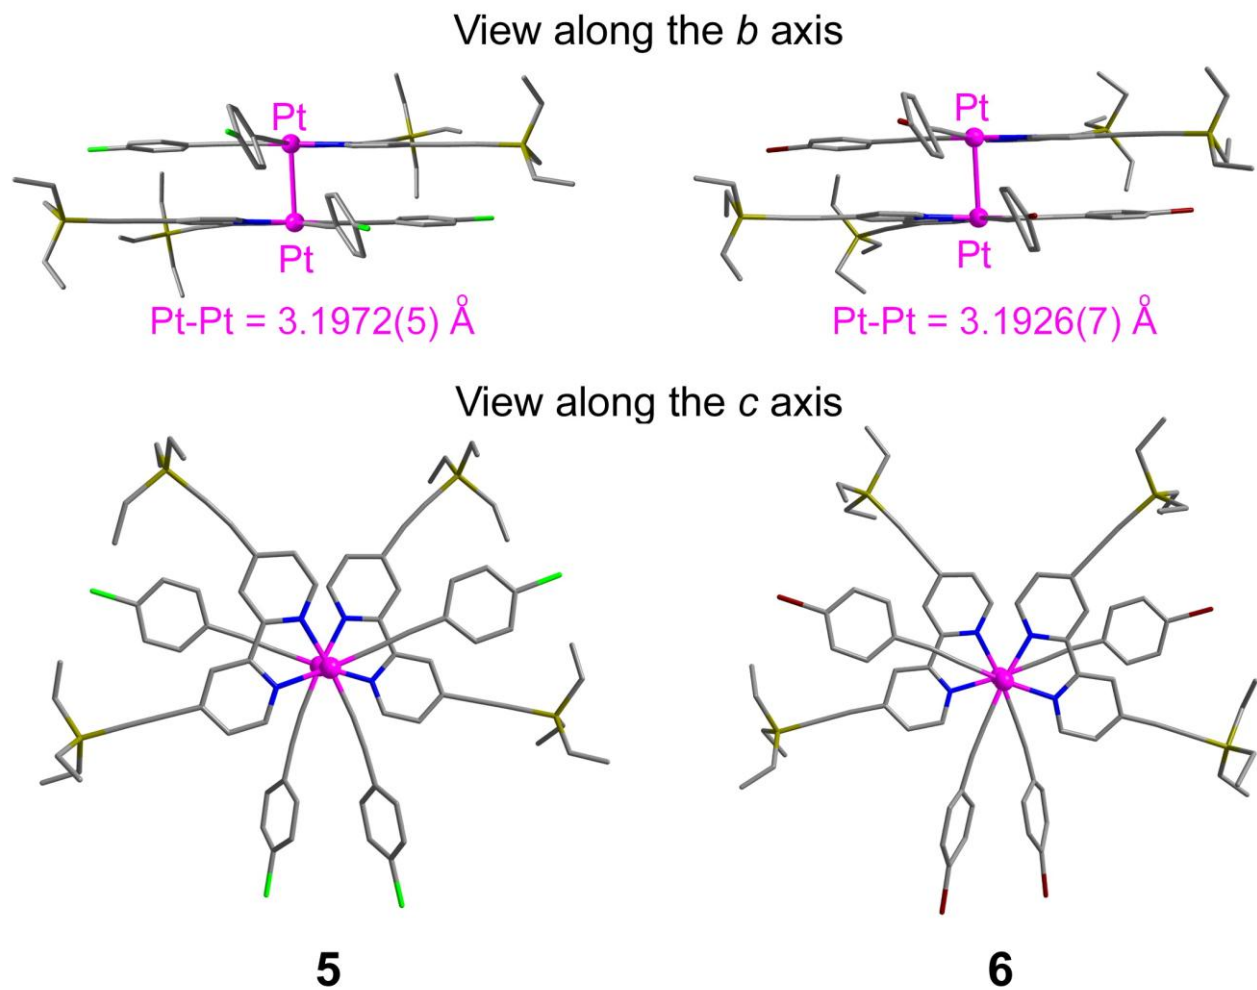

**Figure S5.** The dimer structure of complexes **5** and **6**. The disordered atoms and H atoms are deleted for clarity.

Symmetry code:

a:  $x, 1-y, -1/2+z$

b:  $-x, 1-y, 1-z$

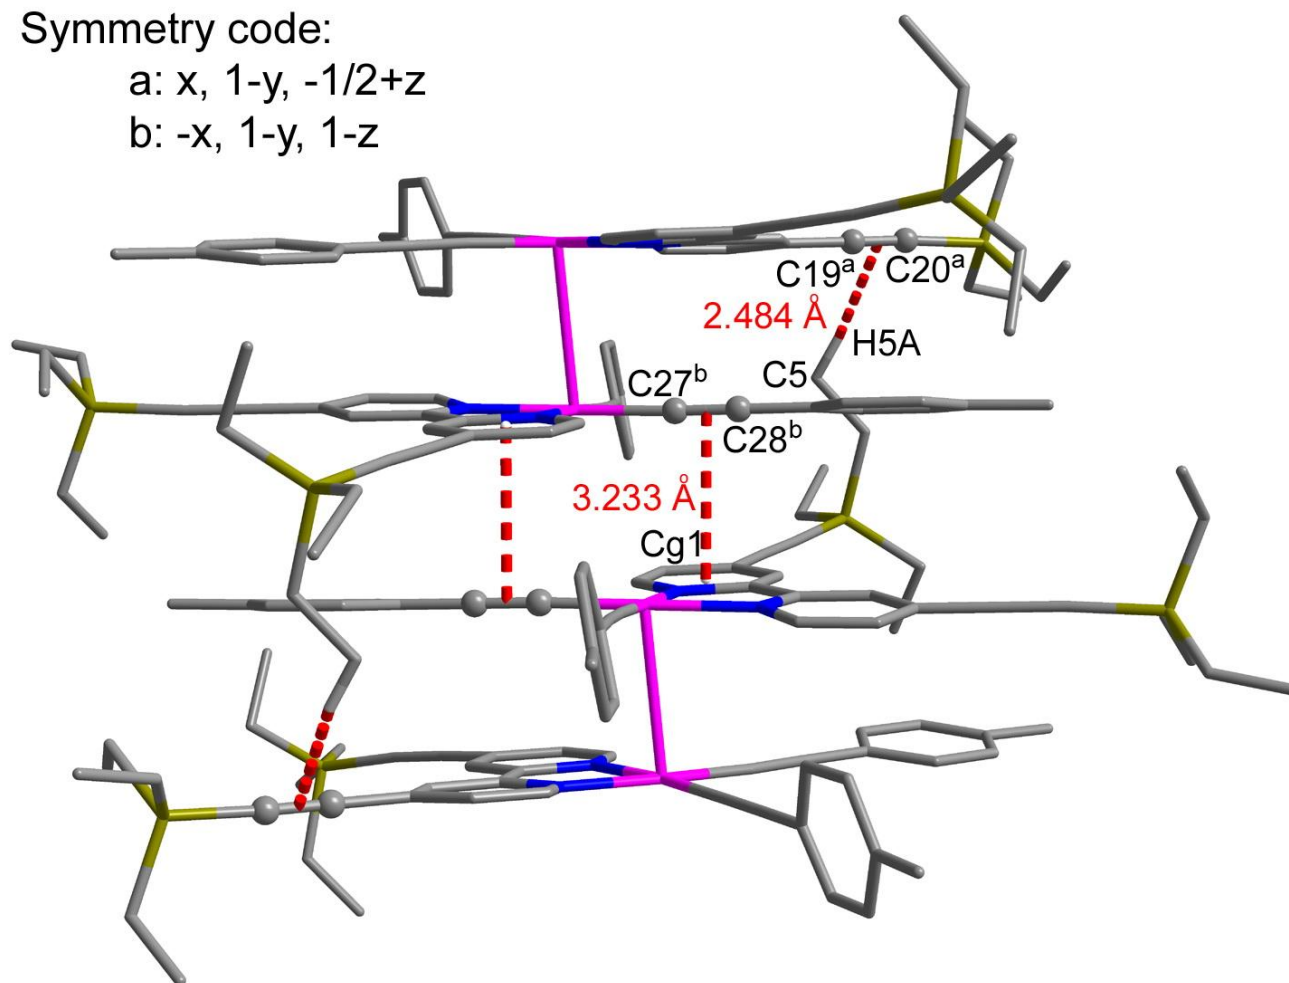

**Figure S6.** The hydrogen bonding and  $\pi$ - $\pi$  stacking interactions between adjacent dimers (along *c* axis) of complex **1**.

Symmetry code:

a:  $x, 1-y, -1/2+z$

b:  $-x, 1-y, 1-z$

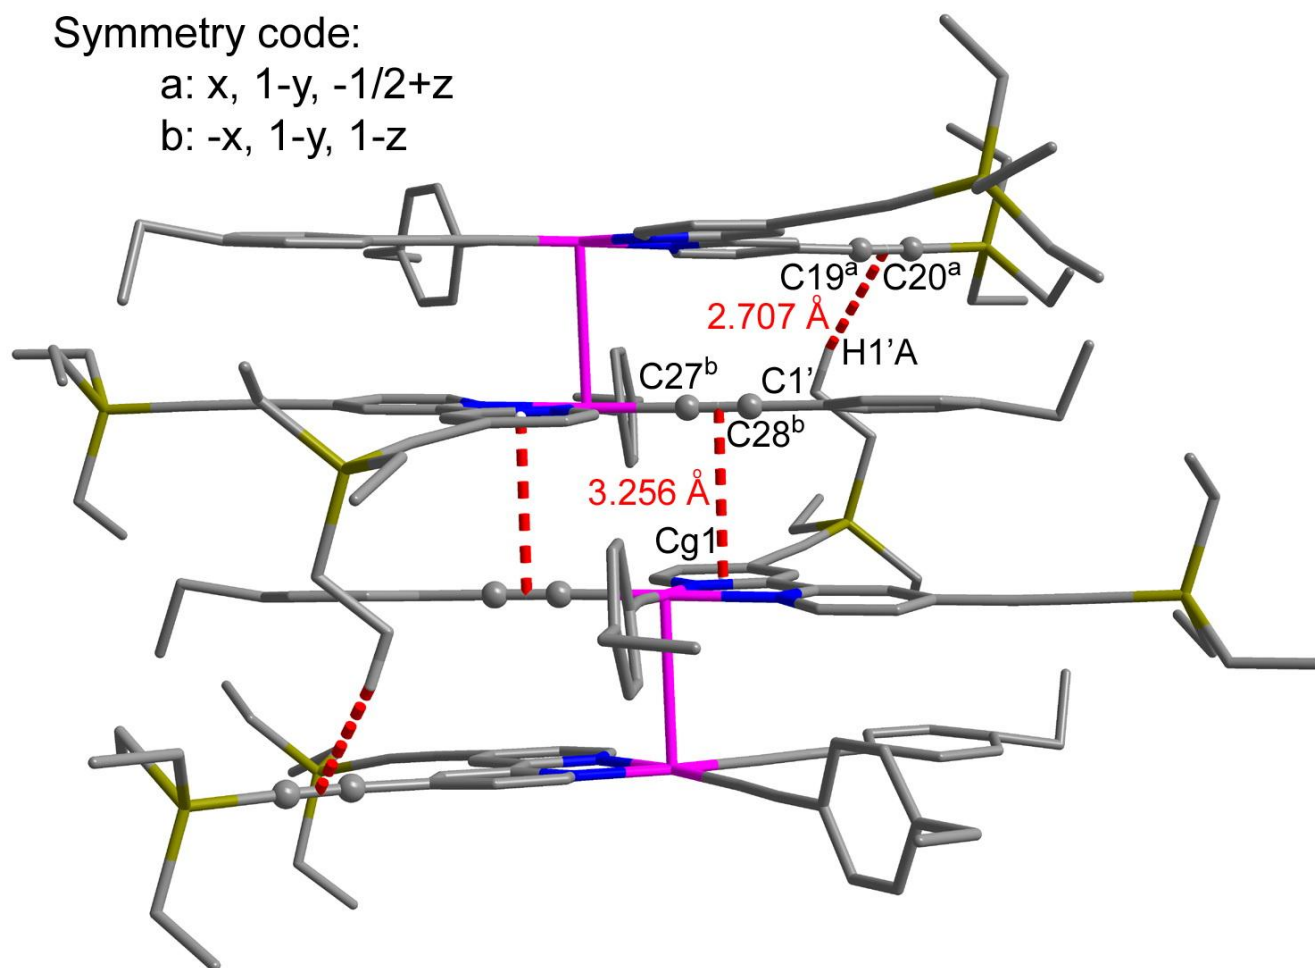

**Figure S7.** The hydrogen bonding and  $\pi$ - $\pi$  stacking interactions between adjacent dimers (along  $c$  axis) of complex **2**.

Symmetry code:  
a: -x, 2-y, -z

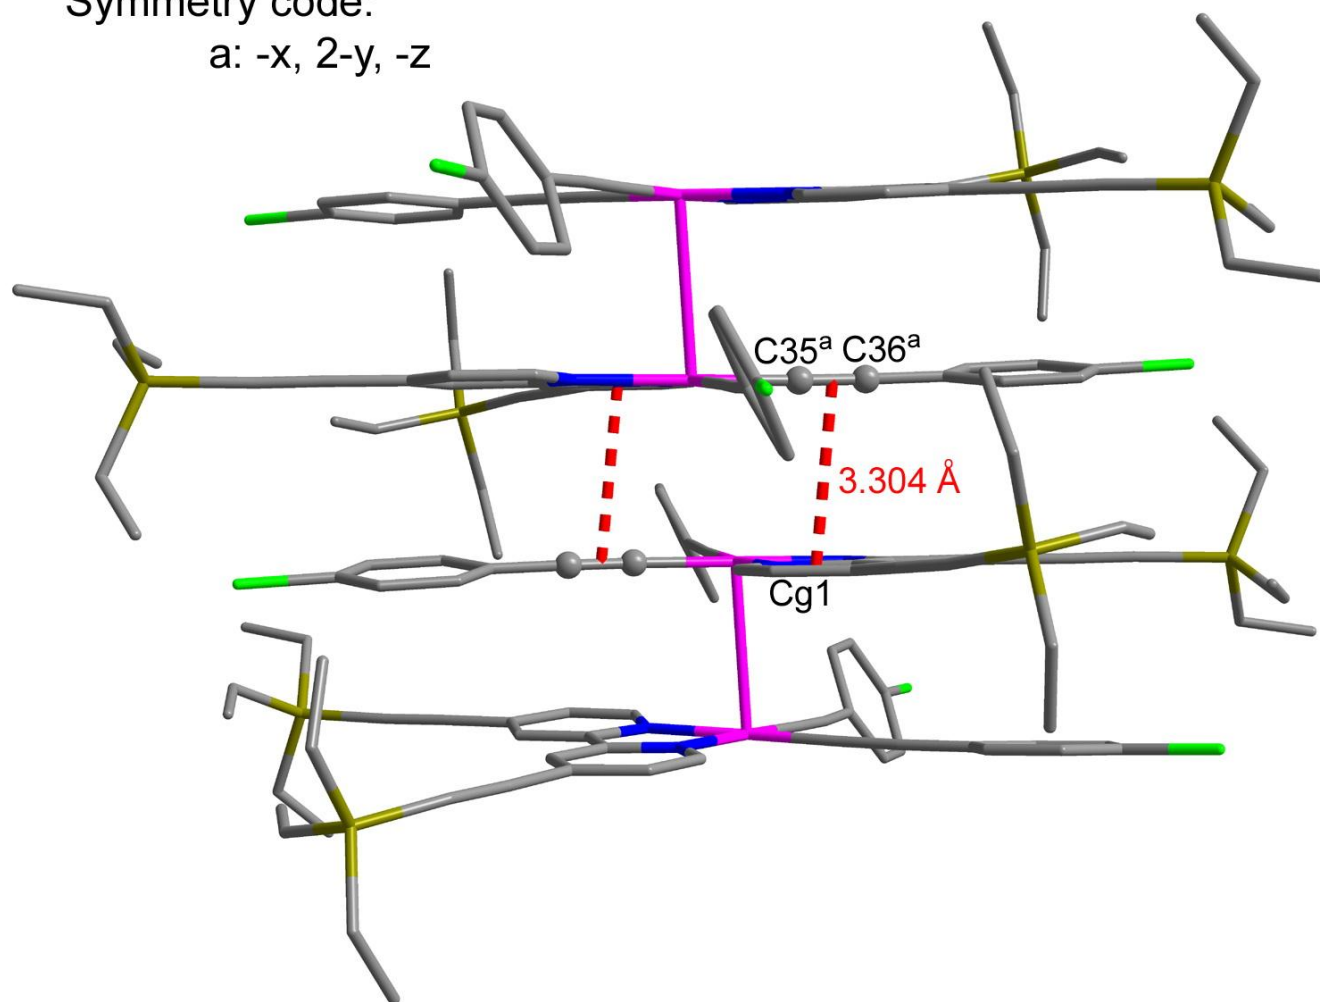

**Figure S8.** The  $\pi$ - $\pi$  stacking interactions between adjacent dimers (along  $c$  axis) of complex **5**.

Symmetry code:

a:  $x, 1-y, -1/2+z$

b:  $1-x, 1-y, 1-z$

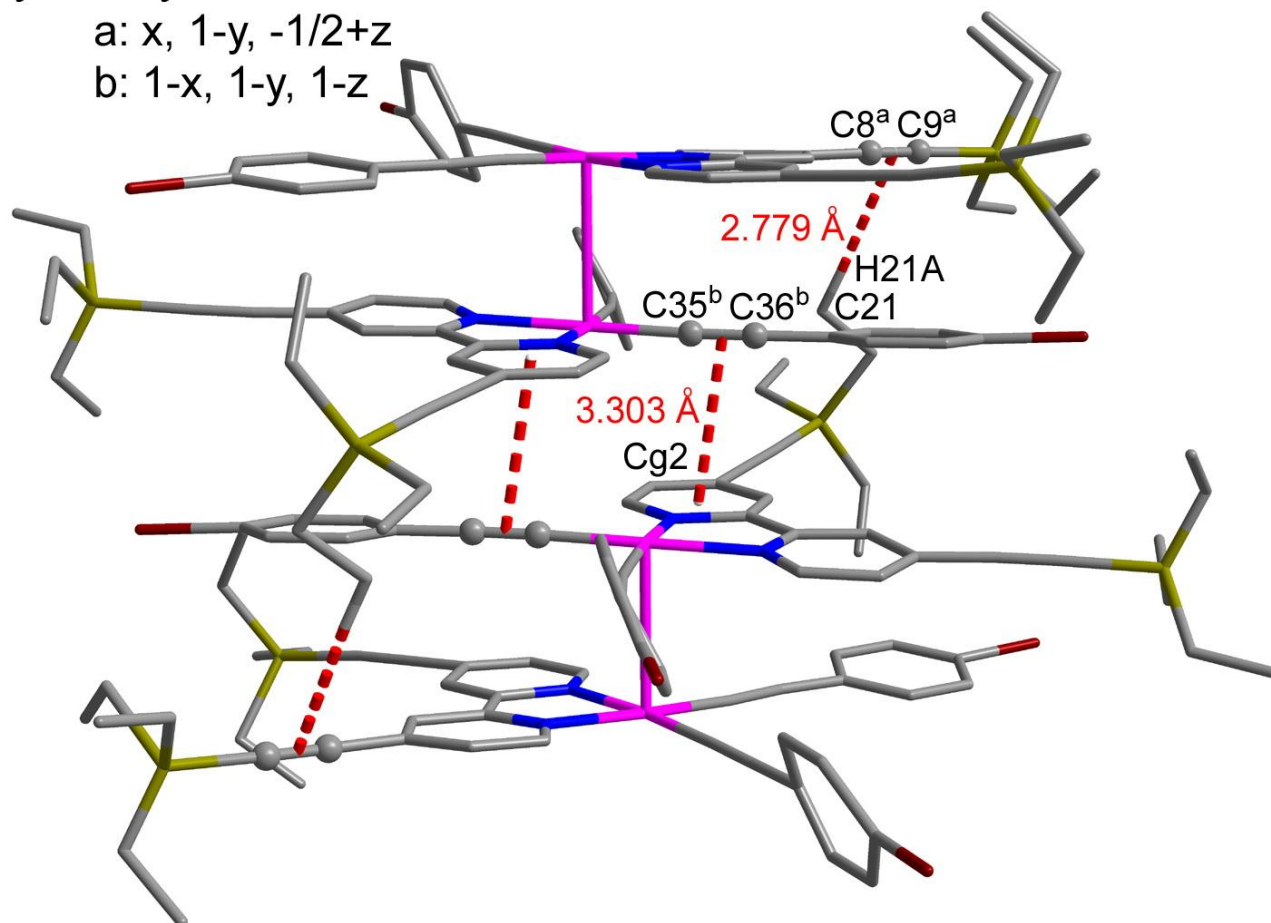

**Figure S9.** The hydrogen bonding and  $\pi$ - $\pi$  stacking interactions between adjacent dimers (along *c* axis) of complex **6**.



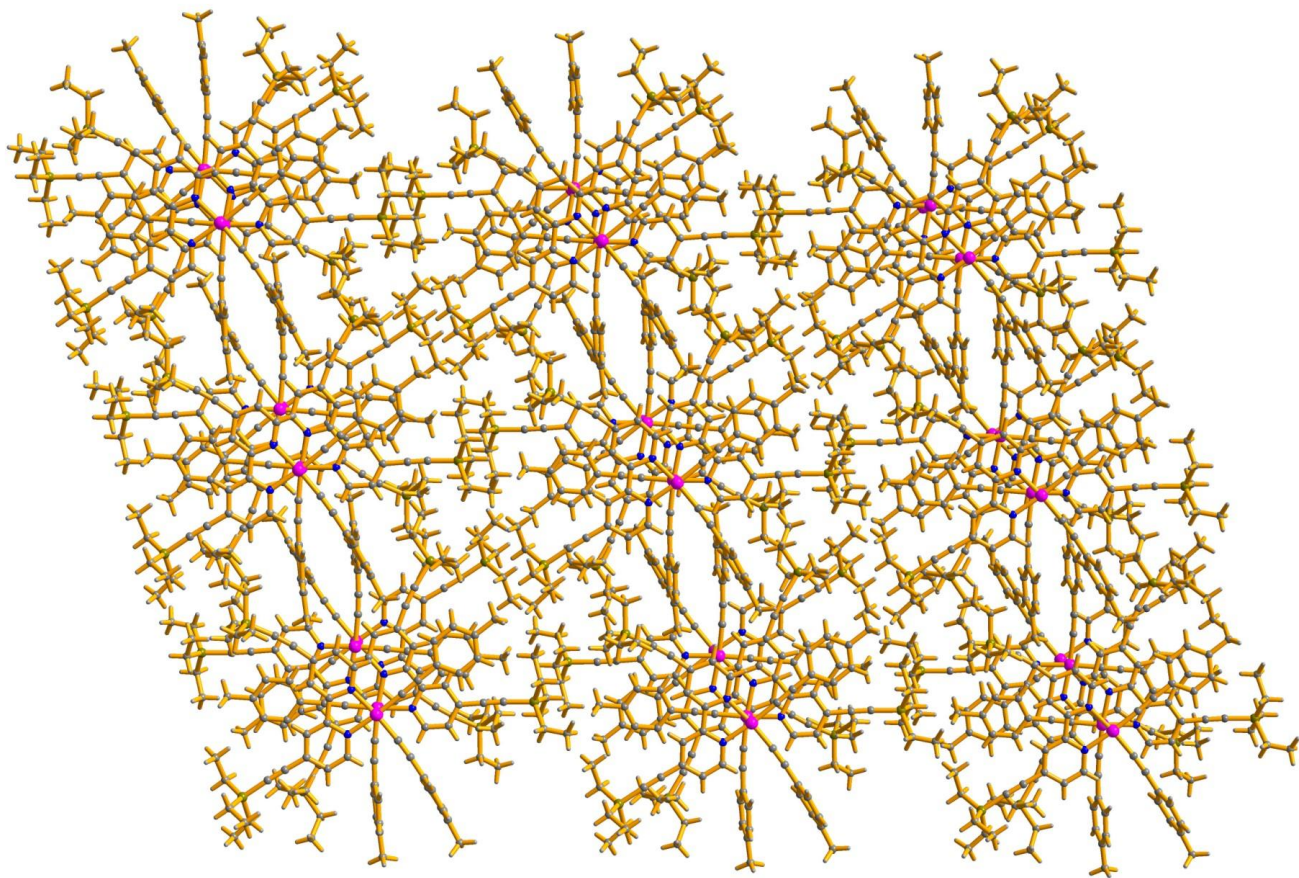

**Figure S10.** The layer stacking structure of complex **1**.

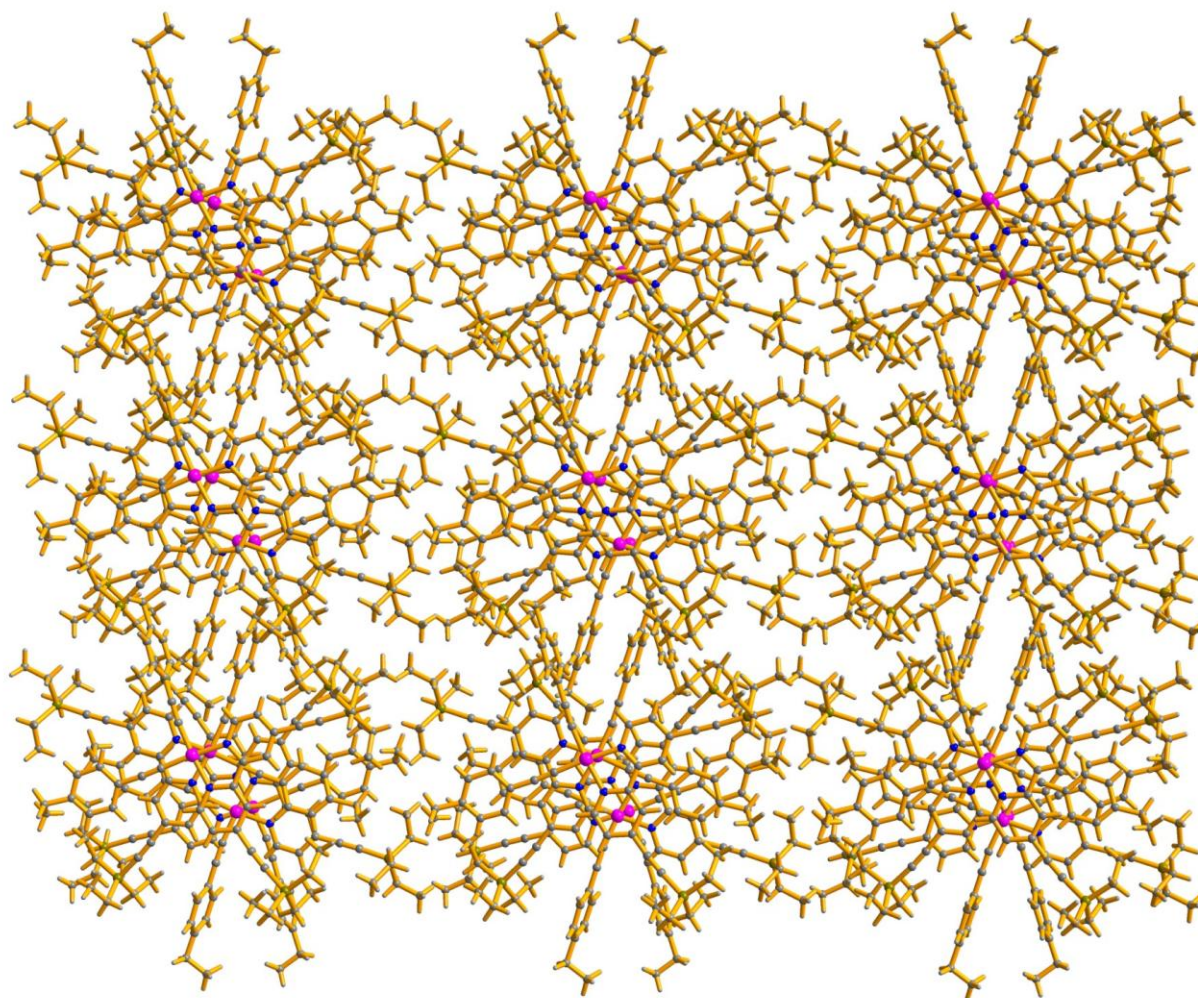

**Figure S11.** The layer stacking structure of complex **2**.



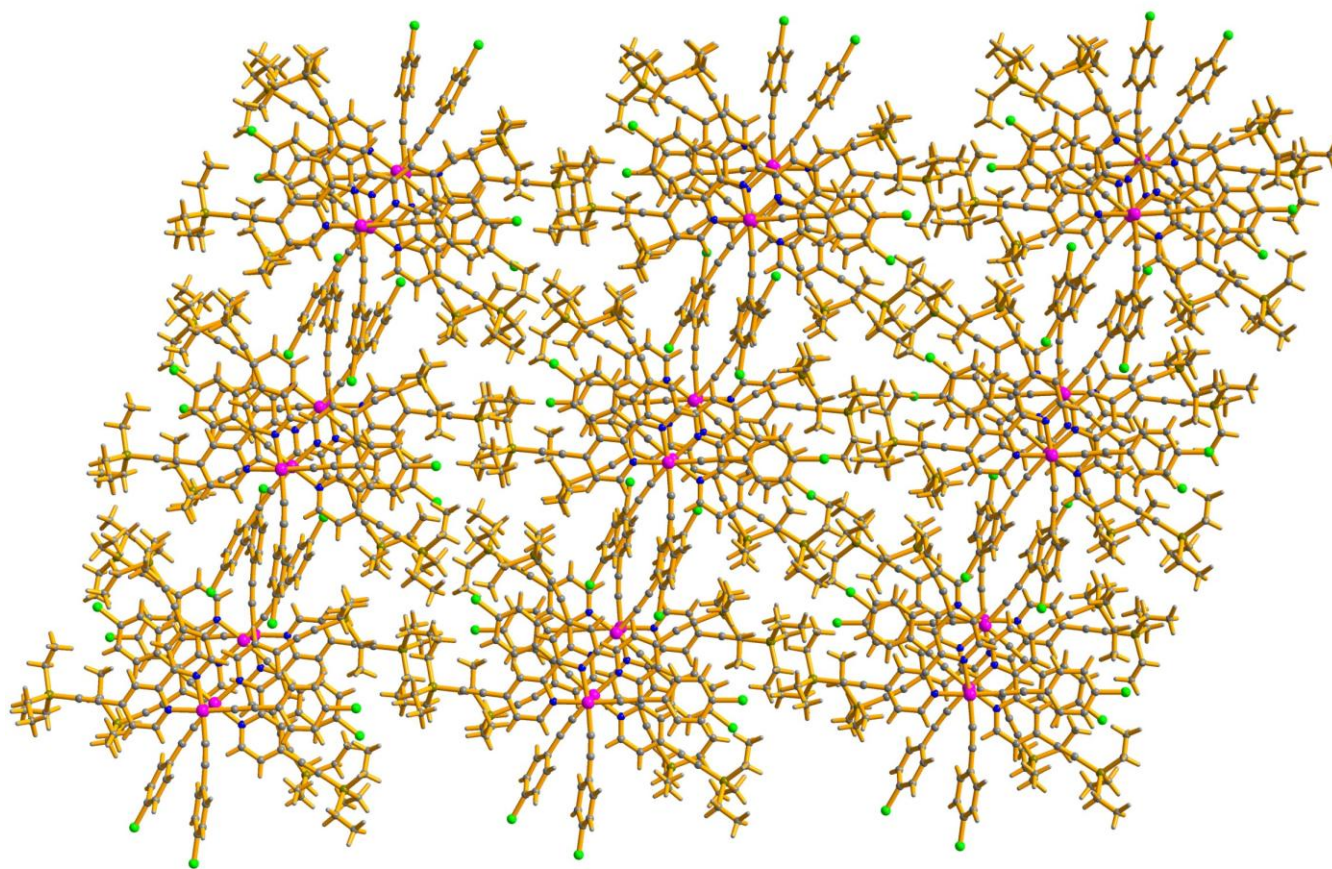

**Figure S12.** The layer stacking structure of complex **5**.

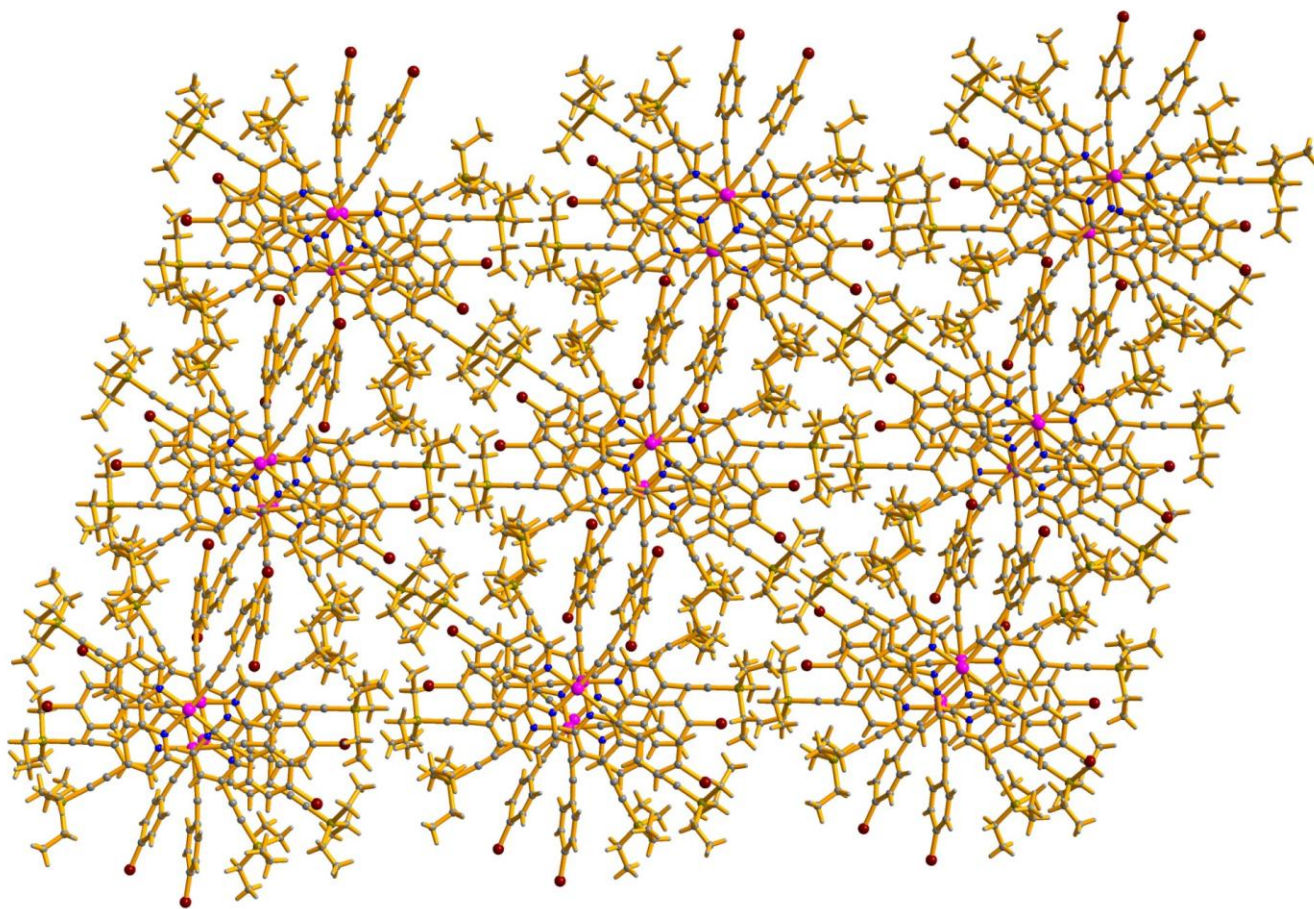

**Figure S13.** The layer stacking structure of complex **6**.

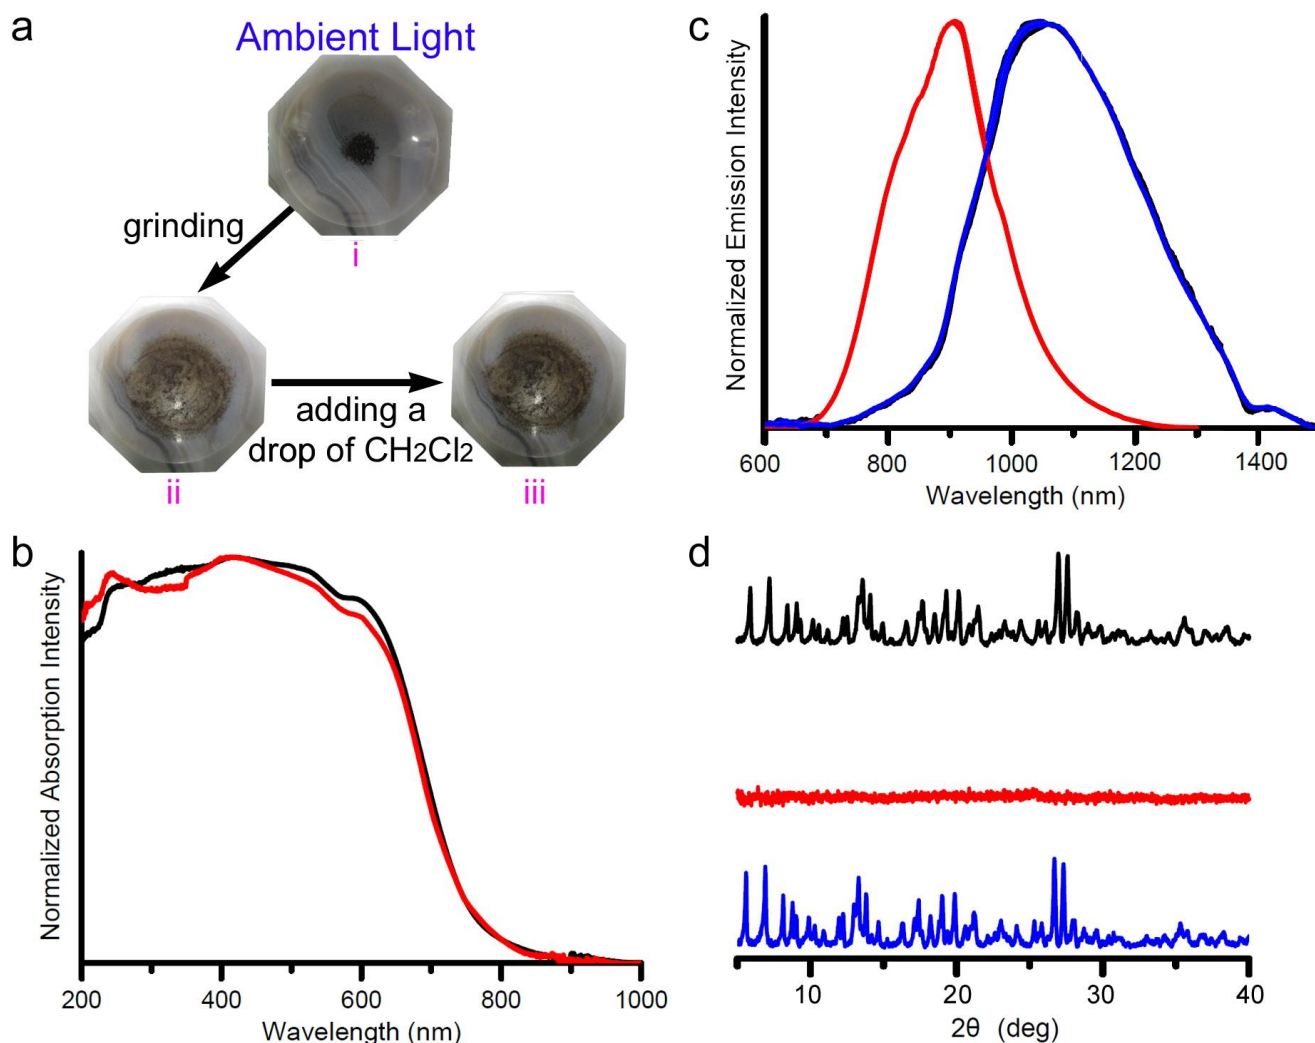

**Figure S14.** The reversible mechanoluminescence of complex **2**. (a) Photographic images of samples [(i) unground sample, (ii) ground sample, (iii) ground sample with a drop of  $\text{CH}_2\text{Cl}_2$  added] under ambient light irradiation during the reversible process. (b) Absorption spectra, (c) emission spectra and (d) PXRD patterns of unground sample (black line), ground sample (red line), and ground sample with a drop of  $\text{CH}_2\text{Cl}_2$  added (blue line).



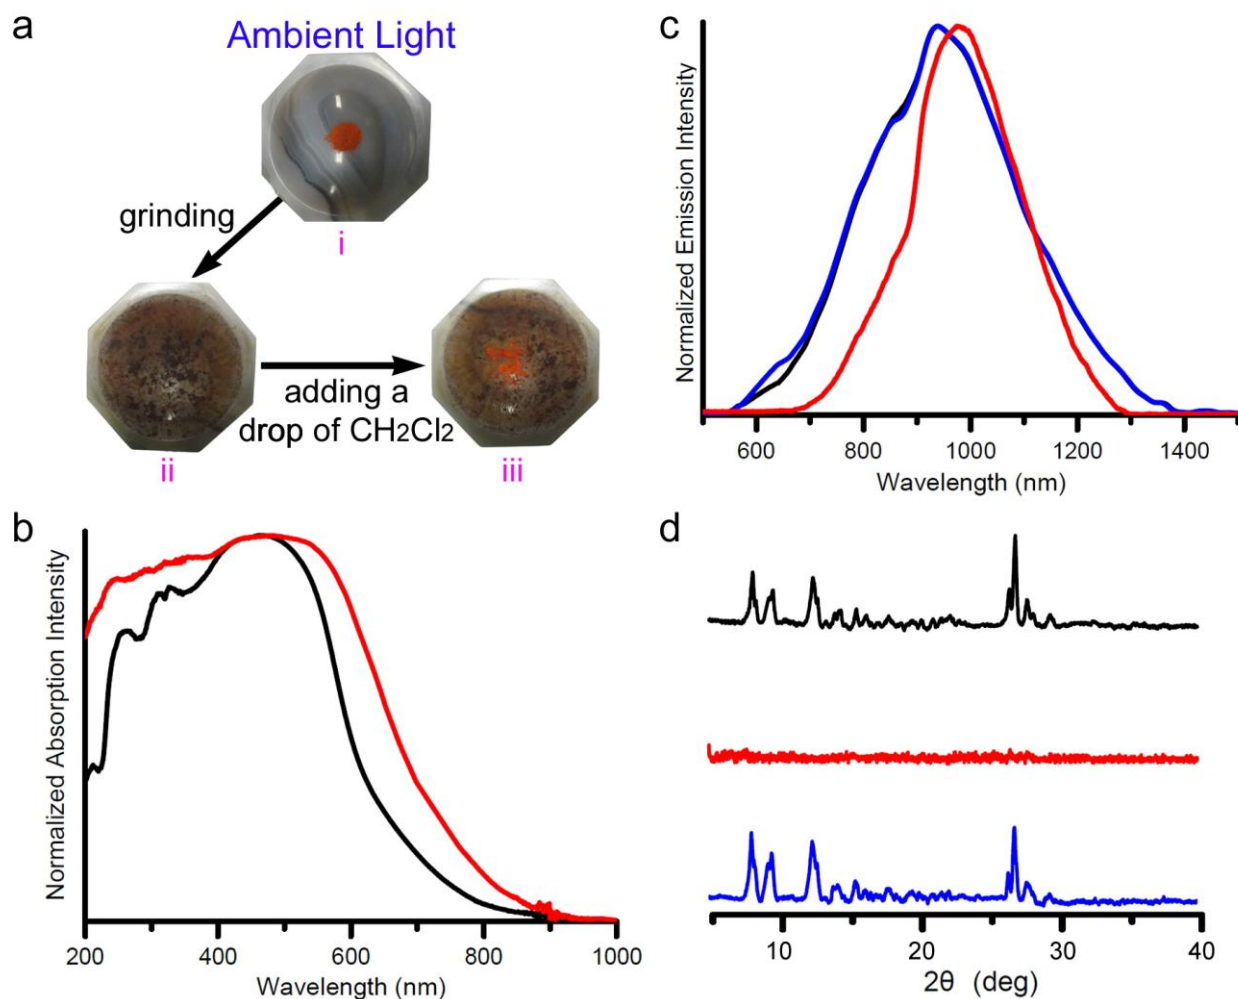

**Figure S15.** The reversible mechanoluminescence of complex **3**. (a) Photographic images of samples [(i) unground sample, (ii) ground sample, (iii) ground sample with a drop of  $\text{CH}_2\text{Cl}_2$  added] under ambient light irradiation during the reversible process. (b) Absorption spectra, (c) emission spectra and (d) PXRD patterns of unground sample (black line), ground sample (red line), and ground sample with a drop of  $\text{CH}_2\text{Cl}_2$  added (blue line).

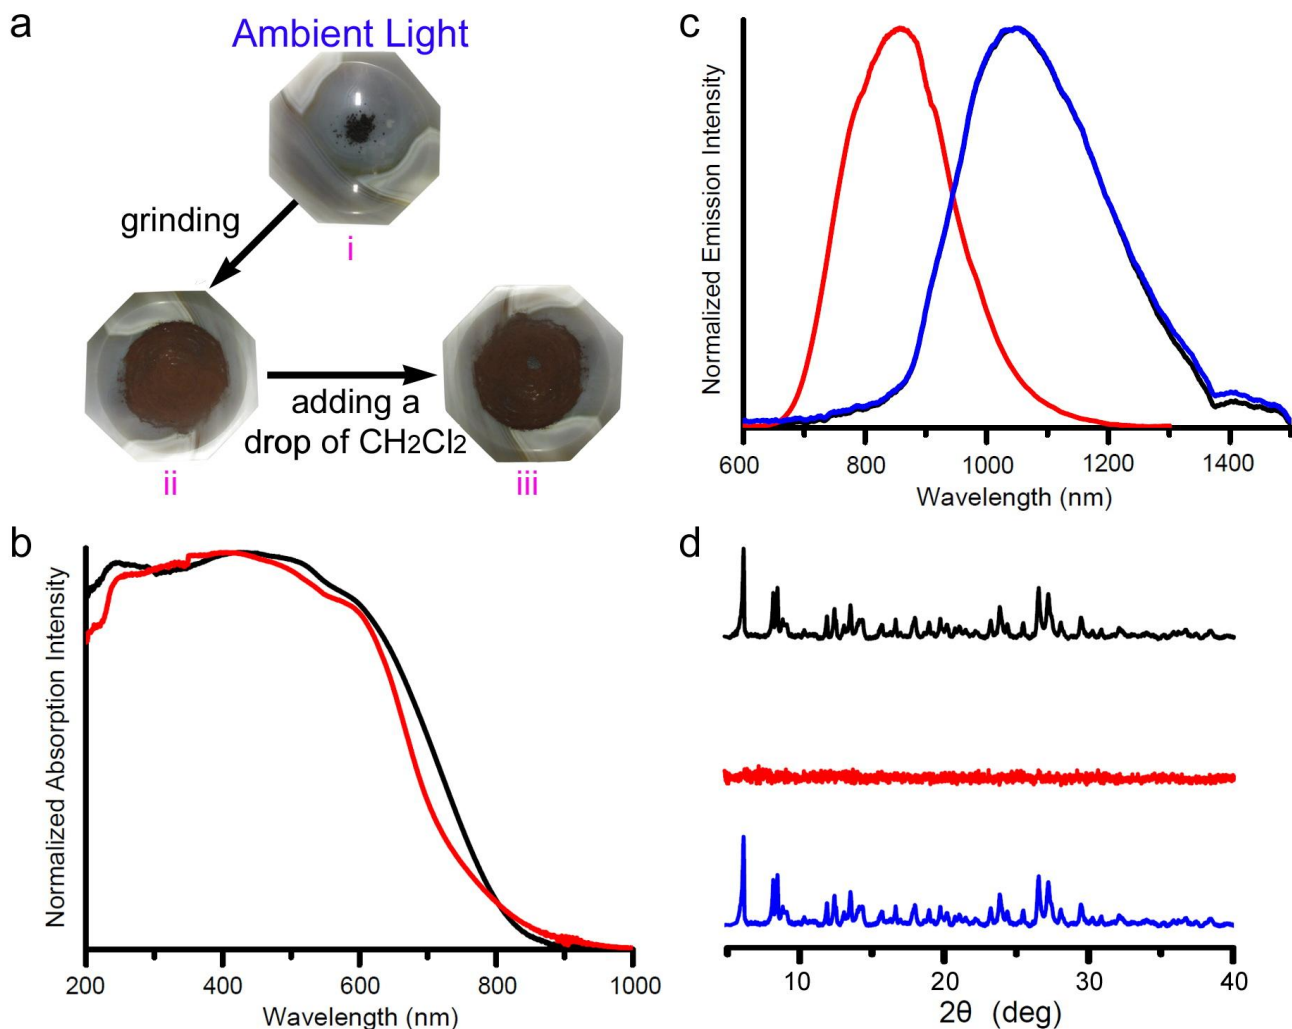

**Figure S16.** The reversible mechanoluminescence of complex 4. (a) Photographic images of samples [(i) unground sample, (ii) ground sample, (iii) ground sample with a drop of  $\text{CH}_2\text{Cl}_2$  added] under ambient light irradiation during the reversible process. (b) Absorption spectra, (c) emission spectra and (d) PXRD patterns of unground sample (black line), ground sample (red line), and ground sample with a drop of  $\text{CH}_2\text{Cl}_2$  added (blue line).

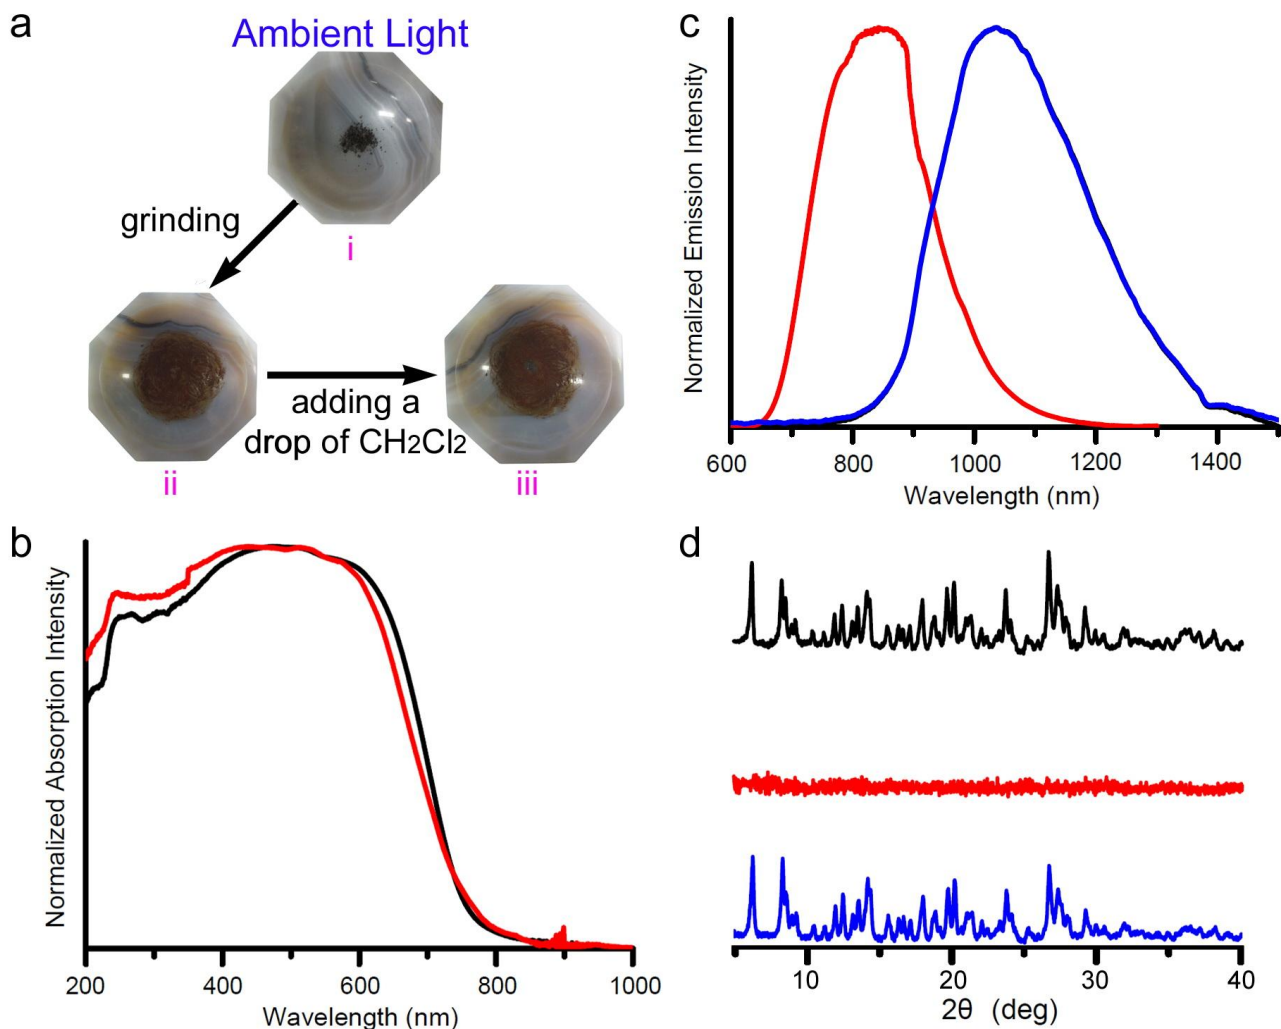

**Figure S17.** The reversible mechanoluminescence of complex **5**. (a) Photographic images of samples [(i) unground sample, (ii) ground sample, (iii) ground sample with a drop of  $\text{CH}_2\text{Cl}_2$  added] under ambient light irradiation during the reversible process. (b) Absorption spectra, (c) emission spectra and (d) PXRD patterns of unground sample (black line), ground sample (red line), and ground sample with a drop of  $\text{CH}_2\text{Cl}_2$  added (blue line).



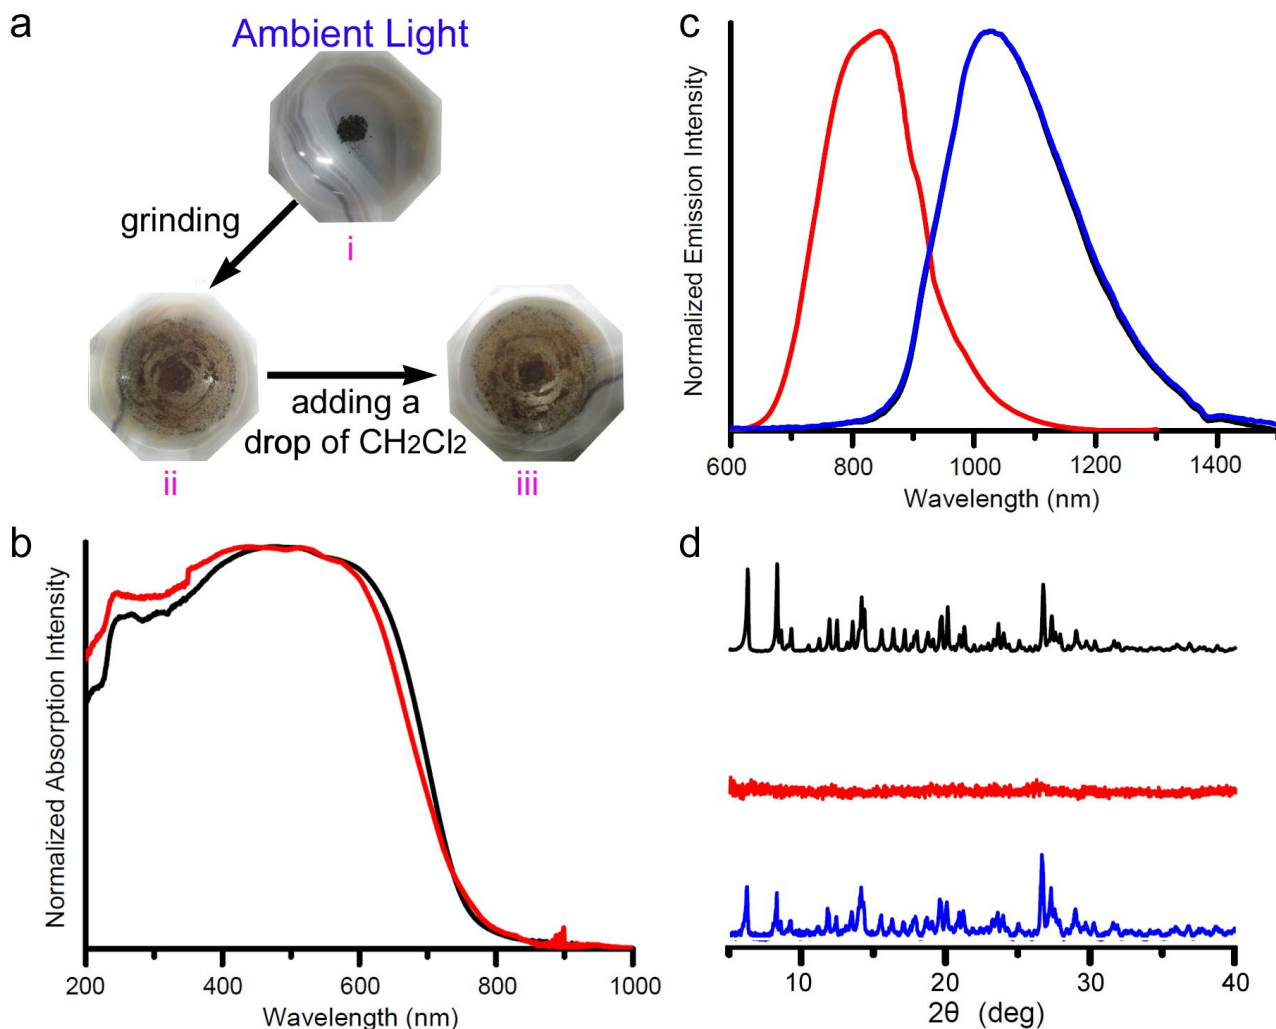

**Figure S18.** The reversible mechanoluminescence of complex **6**. (a) Photographic images of samples [(i) unground sample, (ii) ground sample, (iii) ground sample with a drop of  $\text{CH}_2\text{Cl}_2$  added] under ambient light irradiation during the reversible process. (b) Absorption spectra, (c) emission spectra and (d) PXRD patterns of unground sample (black line), ground sample (red line), and ground sample with a drop of  $\text{CH}_2\text{Cl}_2$  added (blue line).

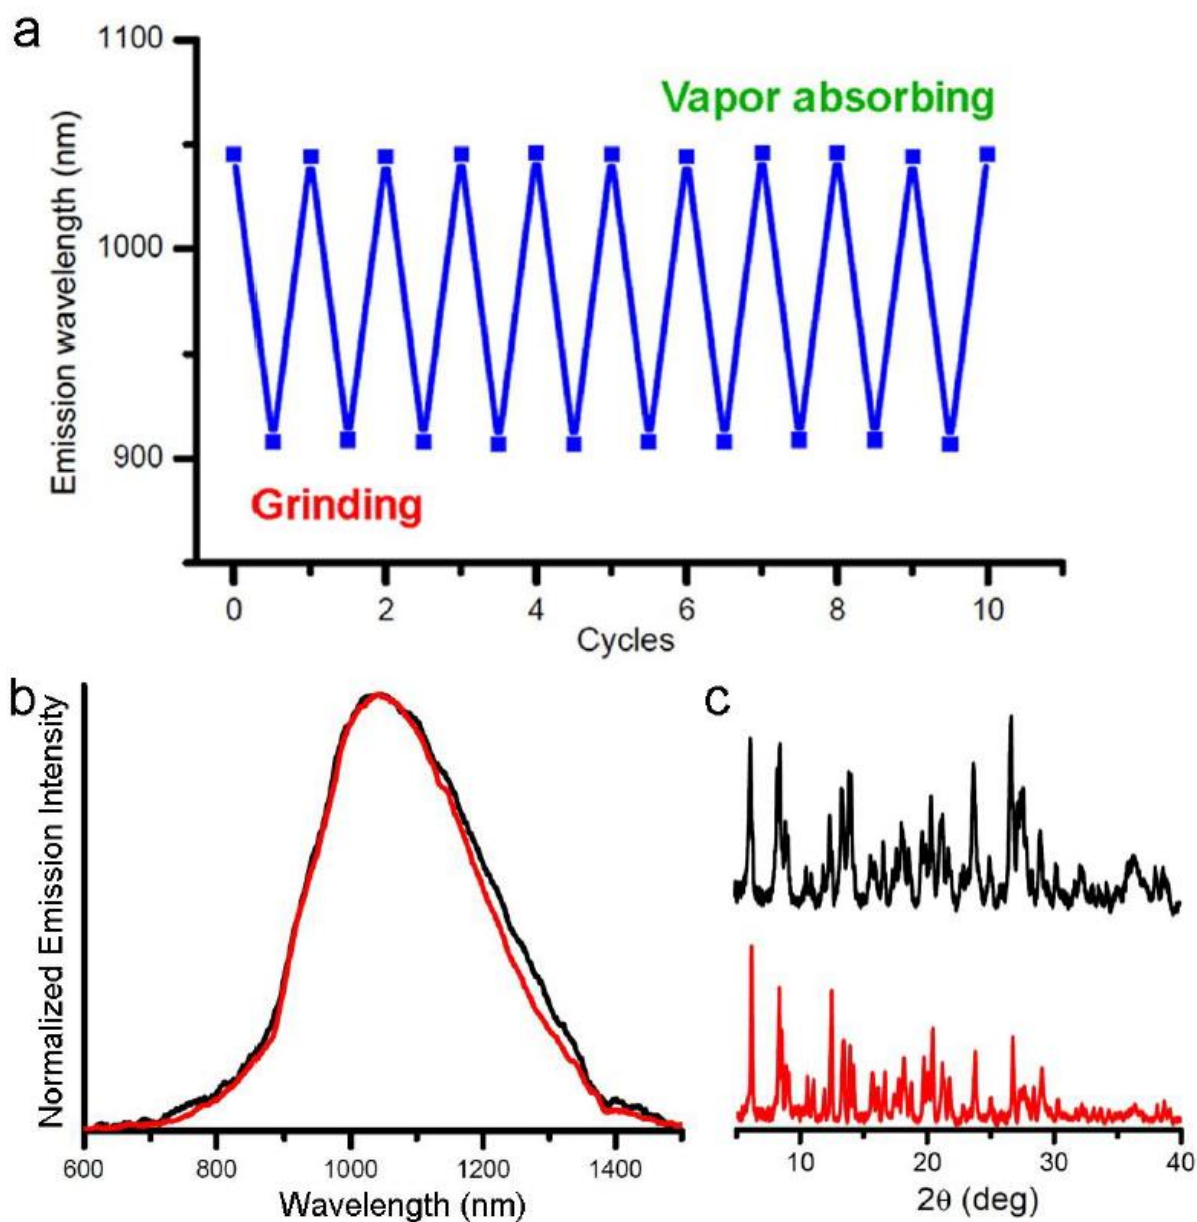

**Figure S19.** (a) Plot of emission wavelength changes during 10-cycles of grinding/vapor absorbing process of **1**. (b) Luminescence spectra and (c) PXRD pattern of **1** before and after 10-cycles of grinding/vapor absorbing process.

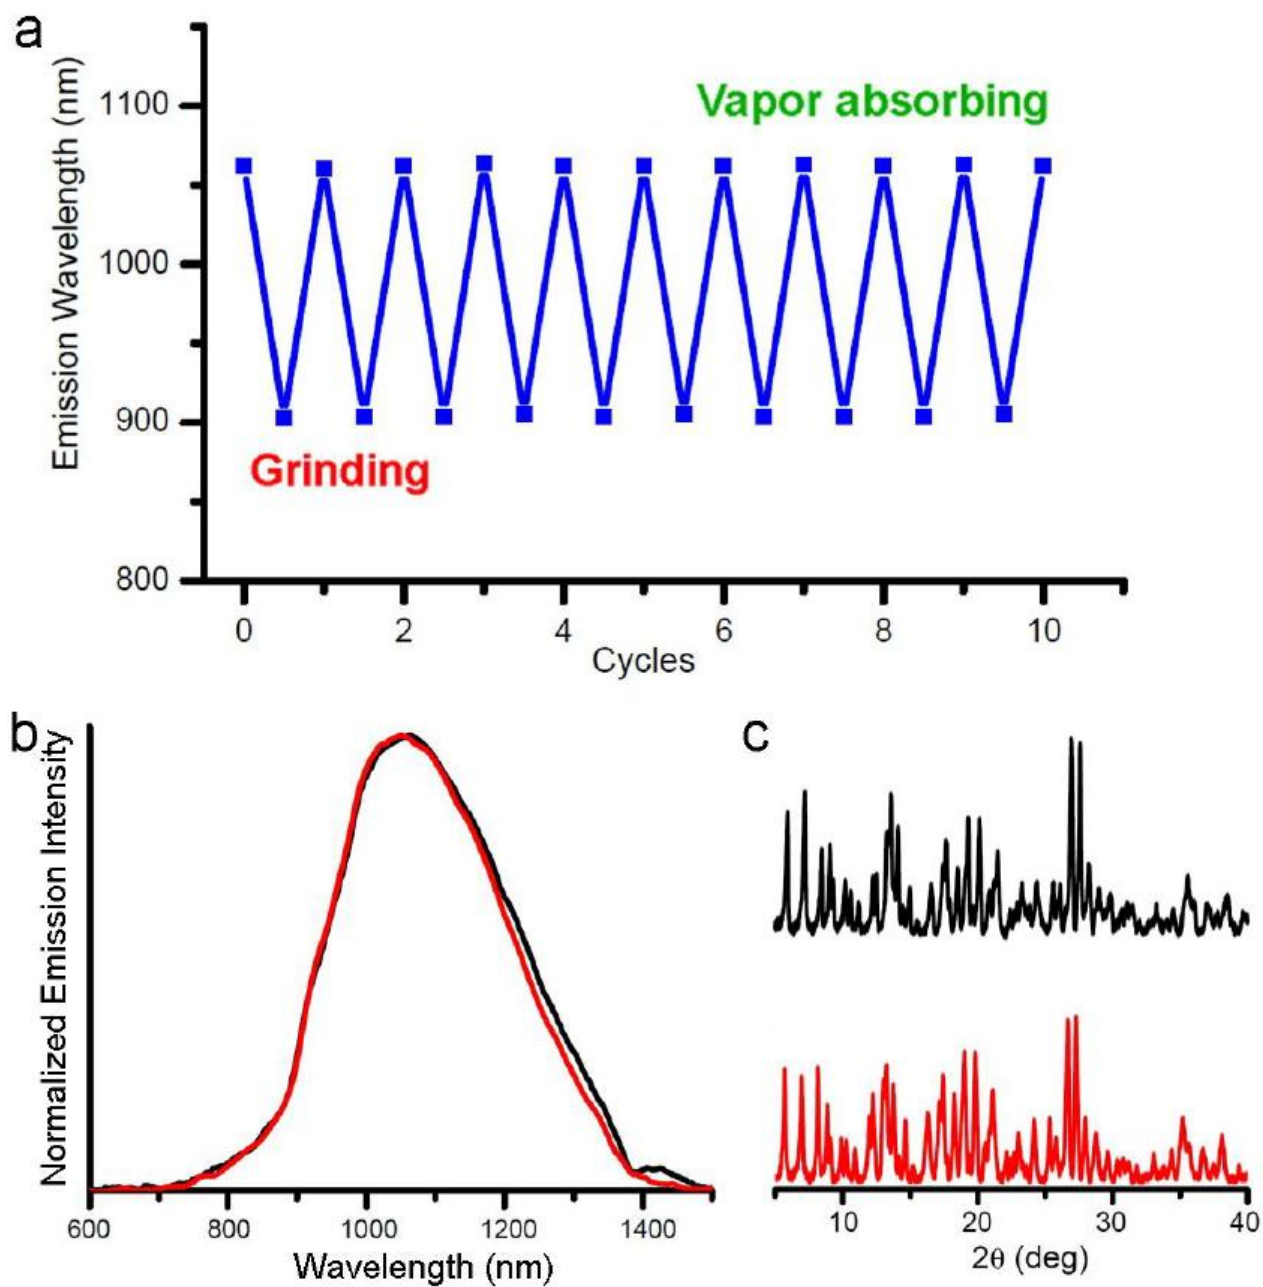

**Figure S20.** (a) Plot of emission wavelength changes during 10-cycles of grinding/vapor absorbing process of **2**. (b) Luminescence spectra and (c) PXRD pattern of **2** before and after 10-cycles of grinding/vapor absorbing process.

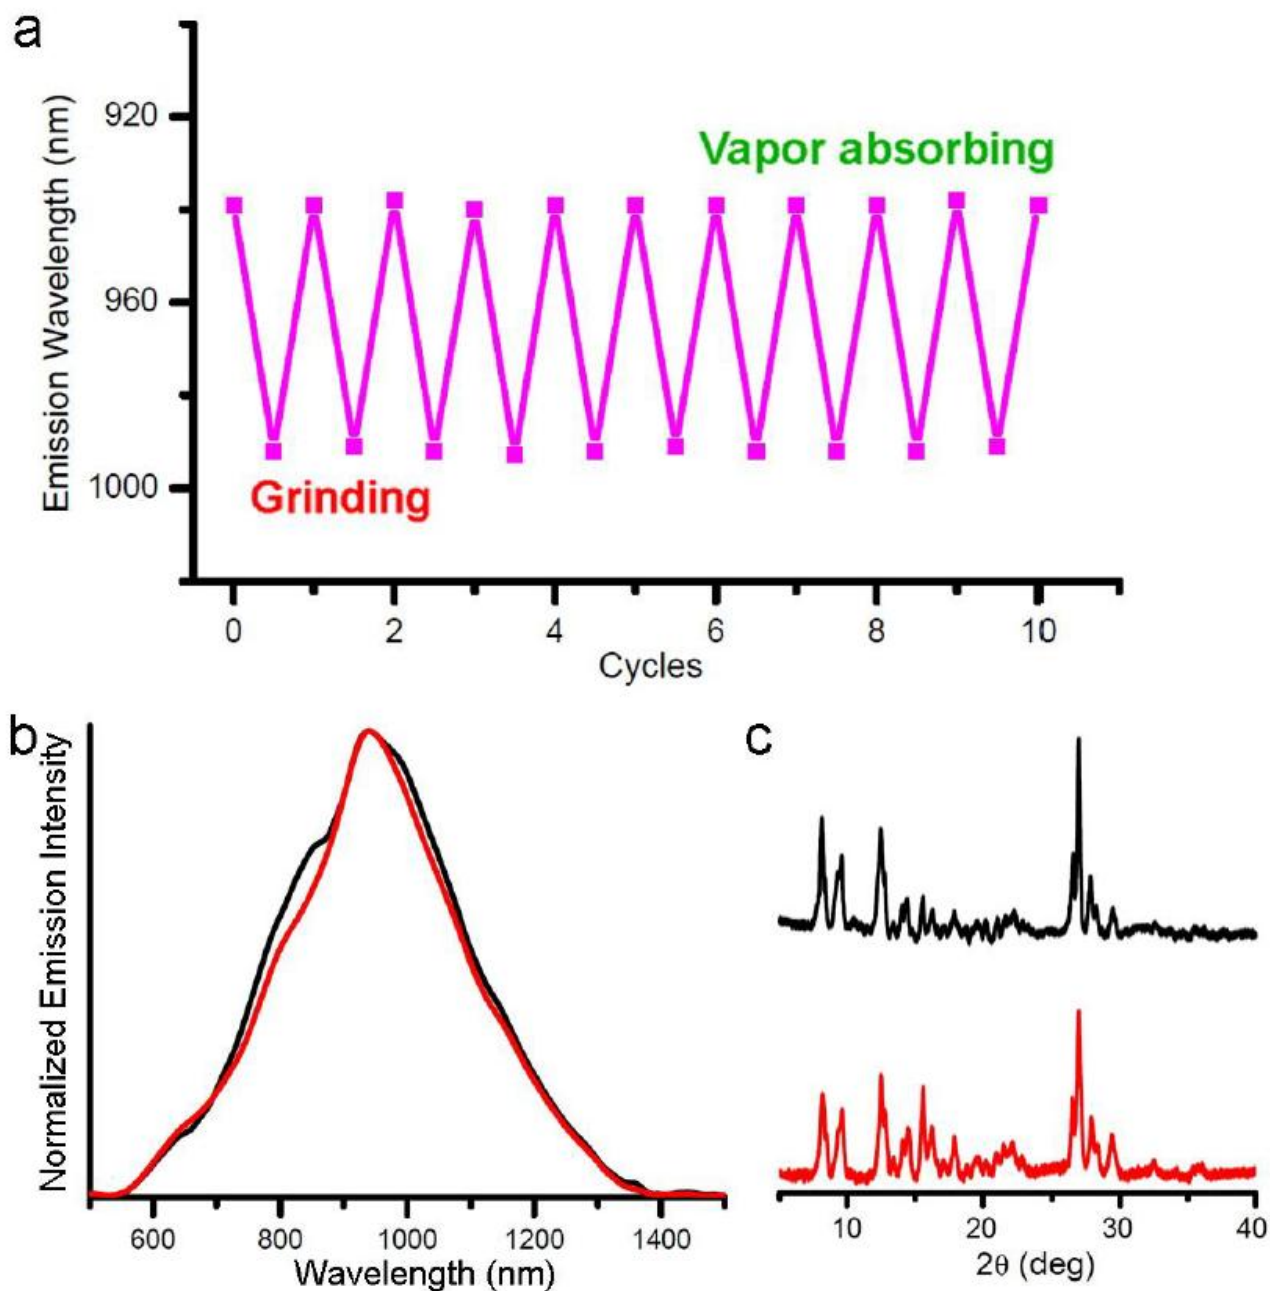

**Figure S21.** (a) Plot of emission wavelength changes during 10-cycles of grinding/vapor absorbing process of **3**. (b) Luminescence spectra and (c) PXRD pattern of **3** before and after 10-cycles of grinding/vapor absorbing process.

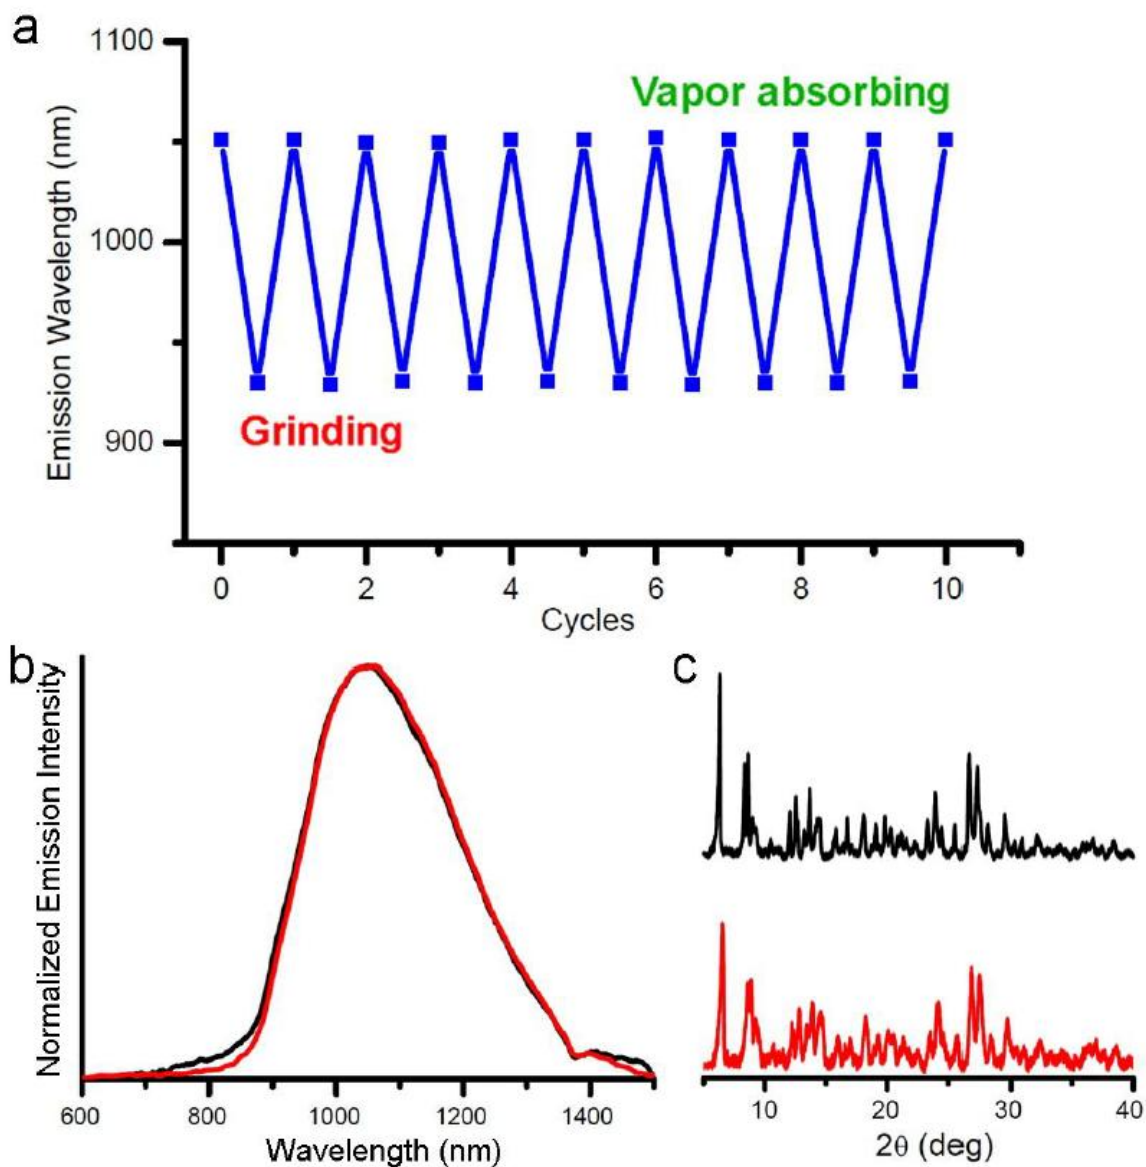

**Figure S22.** (a) Plot of emission wavelength changes during 10-cycles of grinding/vapor absorbing process of **4**. (b) Luminescence spectra and (c) PXRD pattern of **4** before and after 10-cycles of grinding/vapor absorbing process.



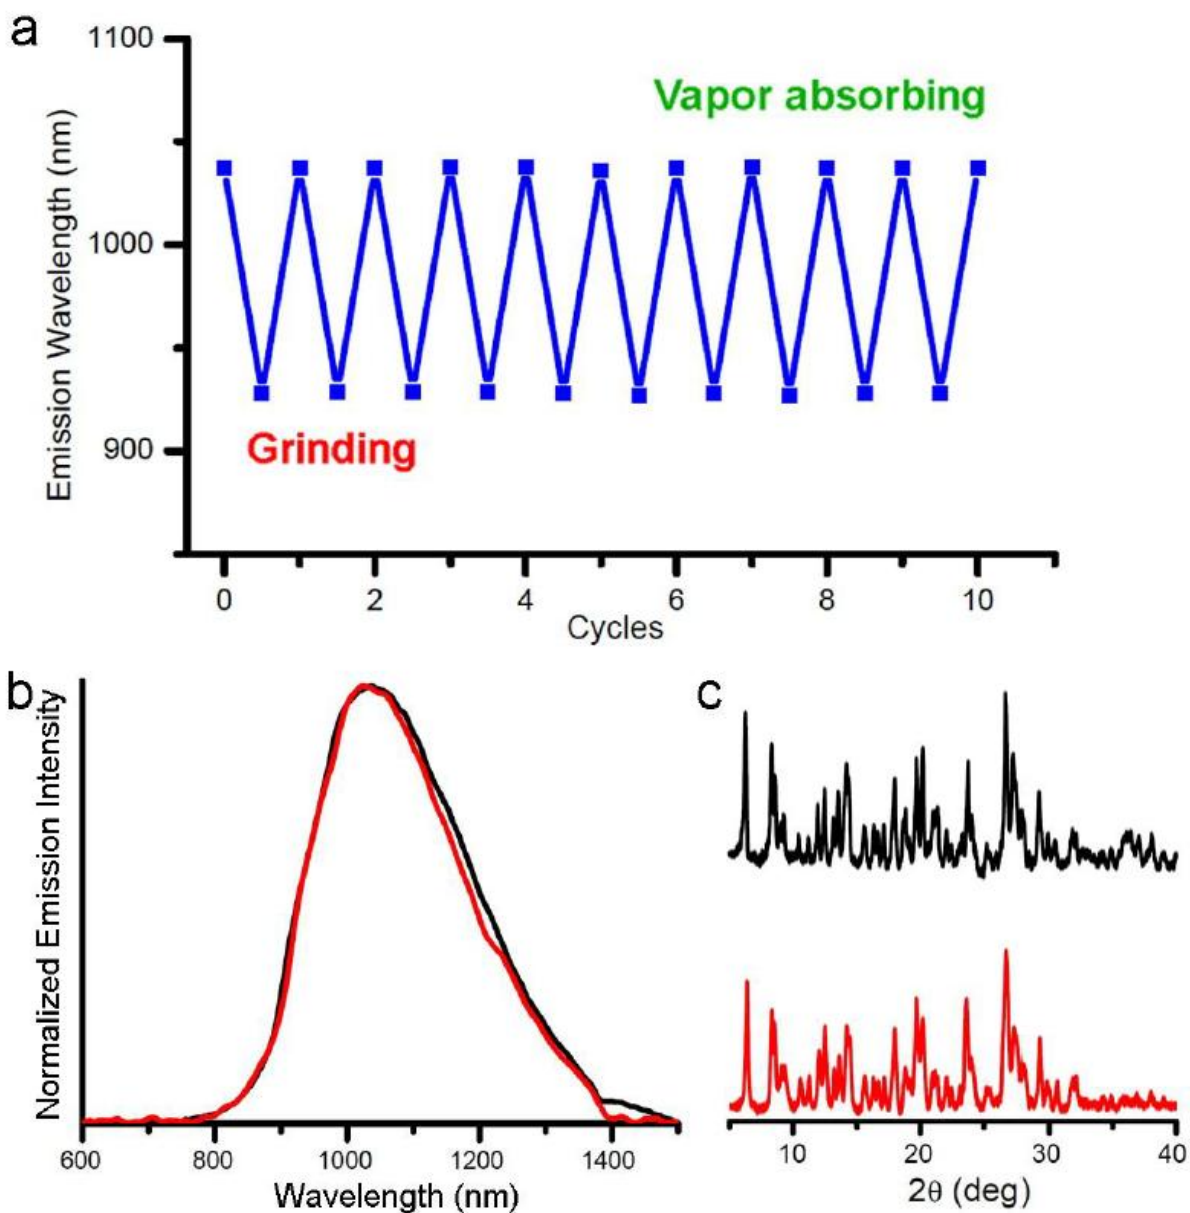

**Figure S23.** (a) Plot of emission wavelength changes during 10-cycles of grinding/vapor absorbing process of **5**. (b) Luminescence spectra and (c) PXRD pattern of **5** before and after 10-cycles of grinding/vapor absorbing process.

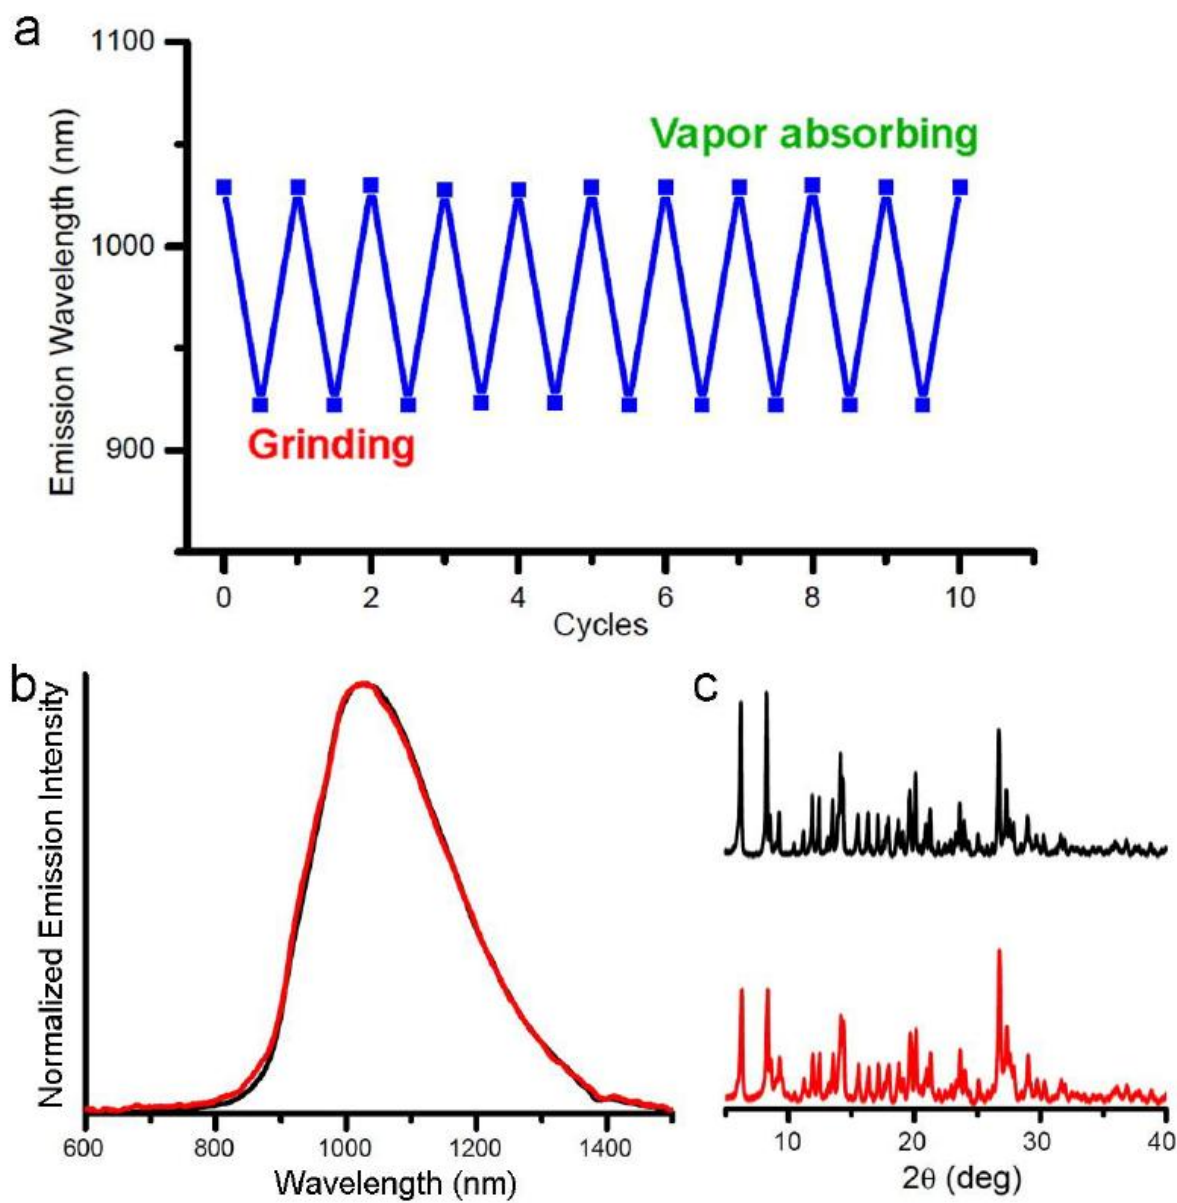

**Figure S24.** (a) Plot of emission wavelength changes during 10-cycles of grinding/vapor absorbing process of **6**. (b) Luminescence spectra and (c) PXRD pattern of **6** before and after 10-cycles of grinding/vapor absorbing process.
